# Supplementary material for: Retrievals of tropospheric ozone profiles from the synergism of AIRS and OMI: methodology and validation
Source: Copernicus journal article supplement (doi:10.5194/amt-11-5587-2018), 2018-10-12
Supplement: Supplementary file 1 [file amt-11-5587-2018-supplement.pdf]

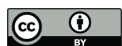

## *Supplement of*

# **Retrievals of tropospheric ozone profiles from the synergism of AIRS and OMI: methodology and validation**

**Dejian Fu et al.**

*Correspondence to:* Dejian Fu ([dejian.fu@jpl.nasa.gov](mailto:dejian.fu@jpl.nasa.gov))

The copyright of individual parts of the supplement might differ from the CC BY 4.0 License.

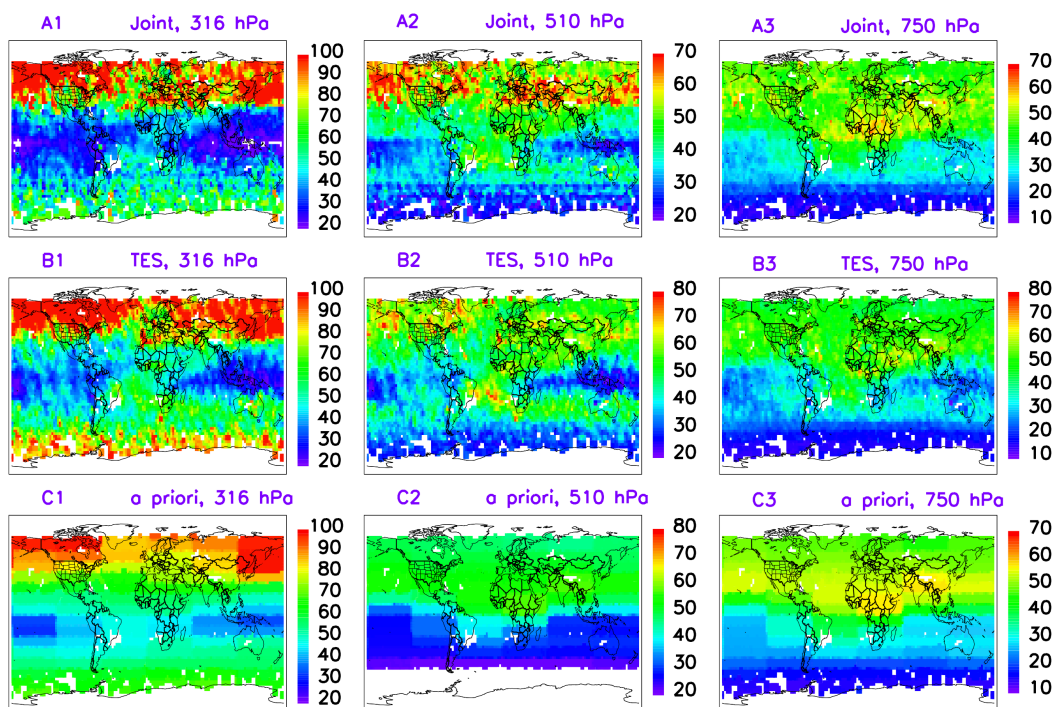

Figure S1: Global maps of monthly averaged ozone ( $O_3$ ) volume mixing ratio (VMR) with a unit of ppb. The A-Train measurements in January 2006 were used in creating these global maps. Comparison of Joint AIRS+OMI (top row, A), TES (middle row, B), and a priori (bottom row C) ozone VMR for the pressure level of 316, 510 and 750 hPa (columns left, middle, right), respectively. All data have been gridded to  $2.5^\circ \times 2.5^\circ$  cells.

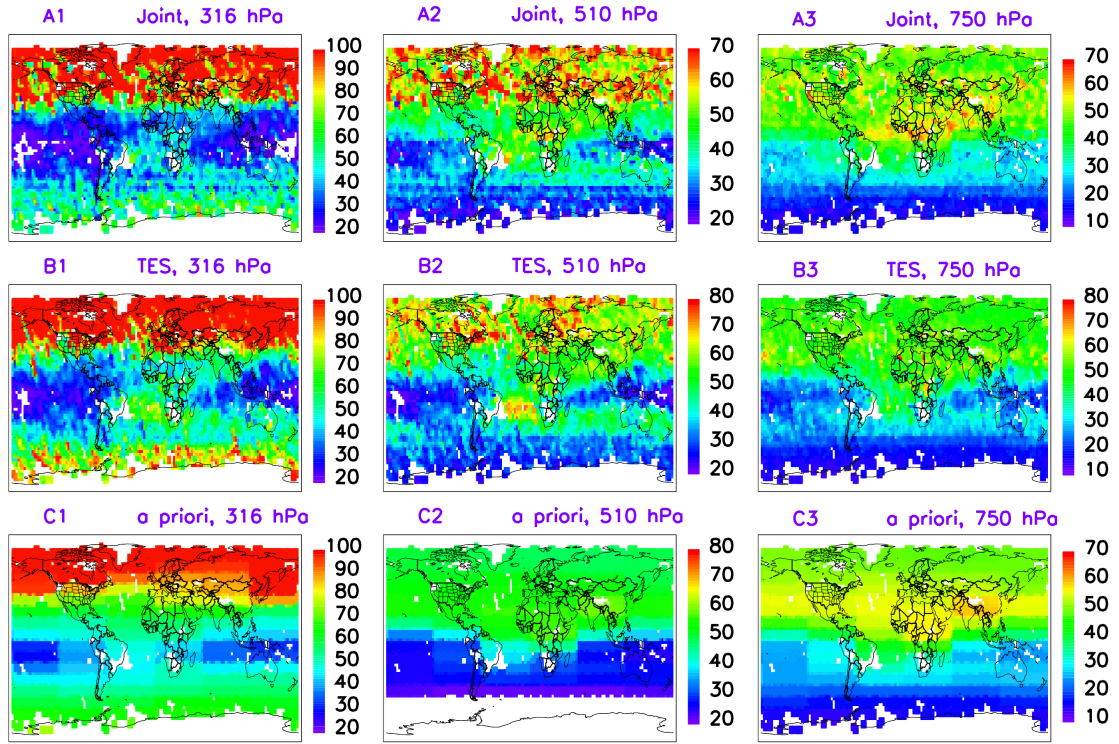

Figure S2: Global maps of monthly averaged ozone ( $O_3$ ) volume mixing ratio (VMR) with a unit of ppb. The A-Train measurements in February 2006 were used in creating these global maps. Comparison of Joint AIRS+OMI (top row, A), TES (middle row, B), and a priori (bottom row C) ozone VMR for the pressure level of 316, 510 and 750 hPa (columns left, middle, right), respectively. All data have been gridded to  $2.5^\circ \times 2.5^\circ$  cells.

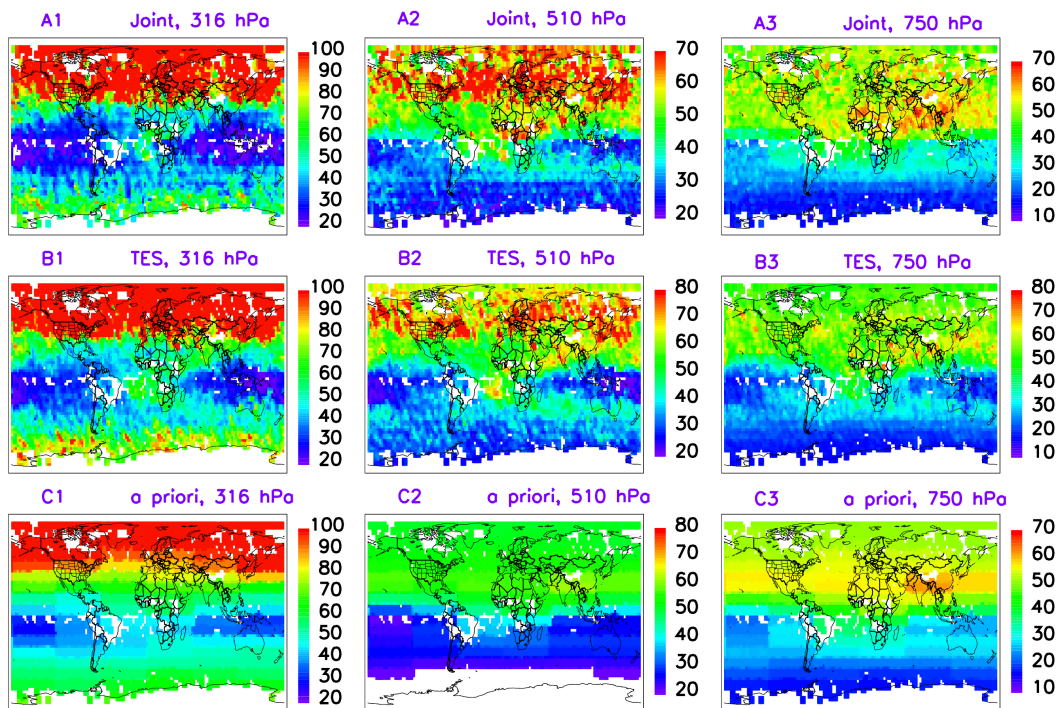

Figure S3: Global maps of monthly averaged ozone ( $O_3$ ) volume mixing ratio (VMR) with a unit of ppb. The A-Train measurements in March 2006 were used in creating these global maps. Comparison of Joint AIRS+OMI (top row, A), TES (middle row, B), and a priori (bottom row C) ozone VMR for the pressure level of 316, 510 and 750 hPa (columns left, middle, right), respectively. All data have been gridded to  $2.5^\circ \times 2.5^\circ$  cells.

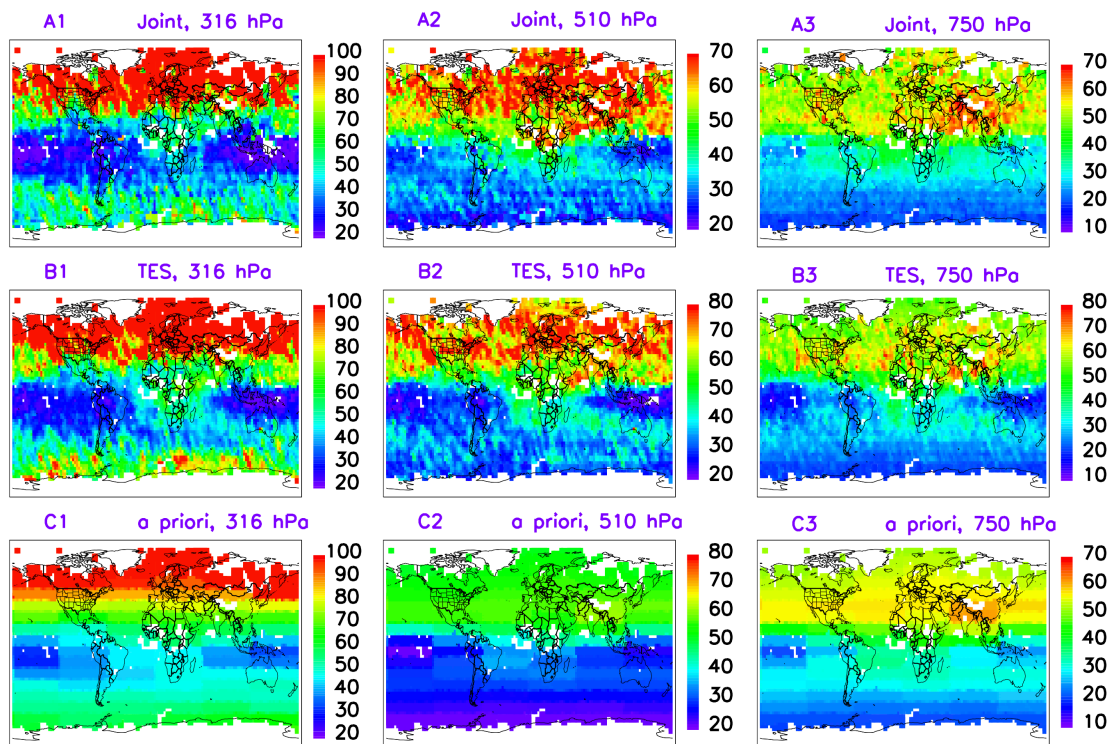

Figure S4: Global maps of monthly averaged ozone ( $O_3$ ) volume mixing ratio (VMR) with a unit of ppb. The A-Train measurements in April 2006 were used in creating these global maps. Comparison of Joint AIRS+OMI (top row, A), TES (middle row, B), and a priori (bottom row C) ozone VMR for the pressure level of 316, 510 and 750 hPa (columns left, middle, right), respectively. All data have been gridded to  $2.5^\circ \times 2.5^\circ$  cells.

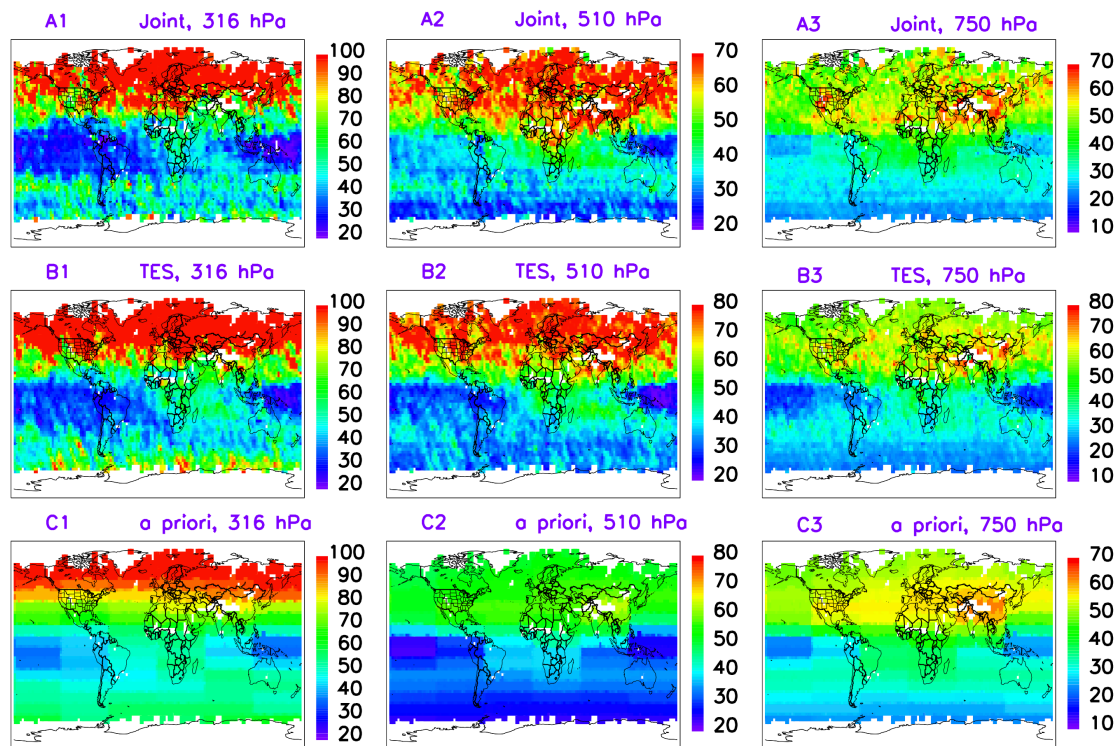

Figure S5: Global maps of monthly averaged ozone ( $O_3$ ) volume mixing ratio (VMR) with a unit of ppb. The A-Train measurements in May 2006 were used in creating these global maps. Comparison of Joint AIRS+OMI (top row, A), TES (middle row, B), and a priori (bottom row C) ozone VMR for the pressure level of 316, 510 and 750 hPa (columns left, middle, right), respectively. All data have been gridded to  $2.5^\circ \times 2.5^\circ$  cells.

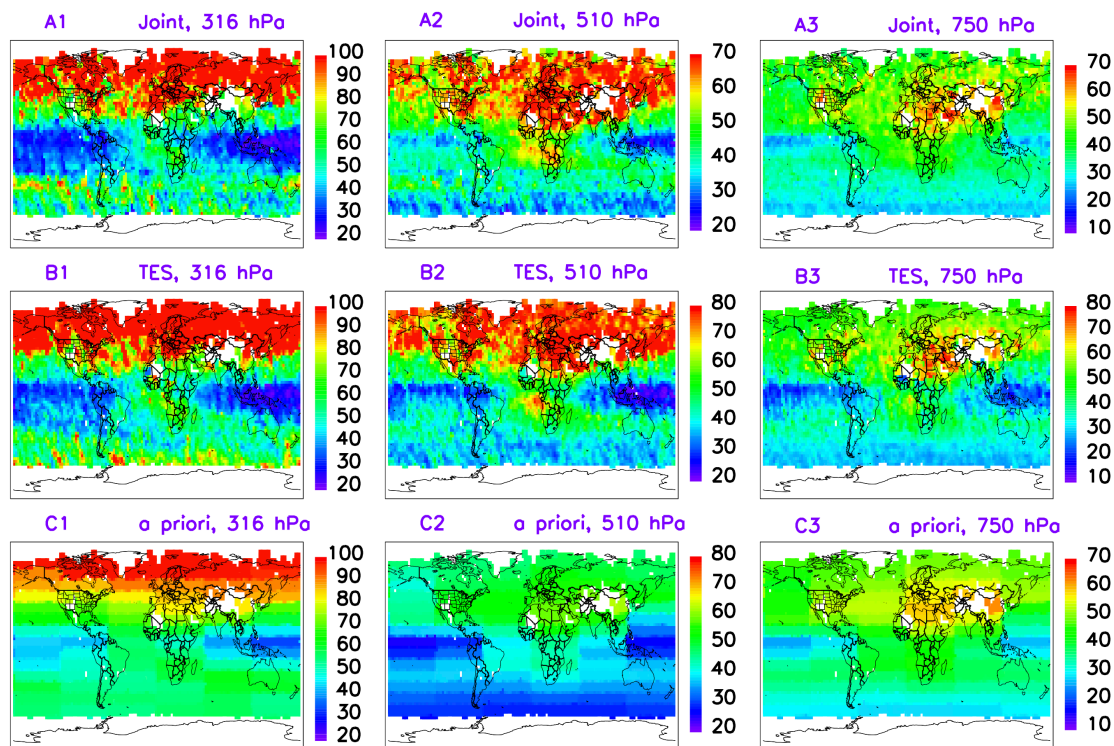

Figure S6: Global maps of monthly averaged ozone ( $O_3$ ) volume mixing ratio (VMR) with a unit of ppb. The A-Train measurements in June 2006 were used in creating these global maps. Comparison of Joint AIRS+OMI (top row, A), TES (middle row, B), and a priori (bottom row C) ozone VMR for the pressure level of 316, 510 and 750 hPa (columns left, middle, right), respectively. All data have been gridded to  $2.5^\circ \times 2.5^\circ$  cells.

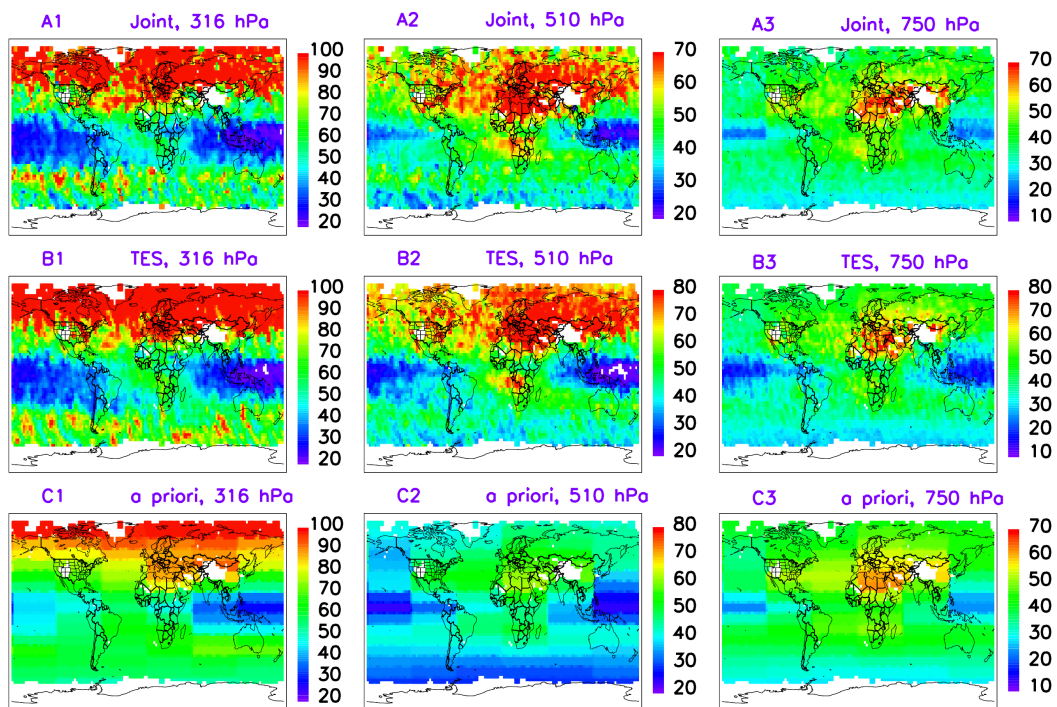

Figure S7: Global maps of monthly averaged ozone ( $O_3$ ) volume mixing ratio (VMR) with a unit of ppb. The A-Train measurements in July 2006 were used in creating these global maps. Comparison of Joint AIRS+OMI (top row, A), TES (middle row, B), and a priori (bottom row C) ozone VMR for the pressure level of 316, 510 and 750 hPa (columns left, middle, right), respectively. All data have been gridded to  $2.5^\circ \times 2.5^\circ$  cells.

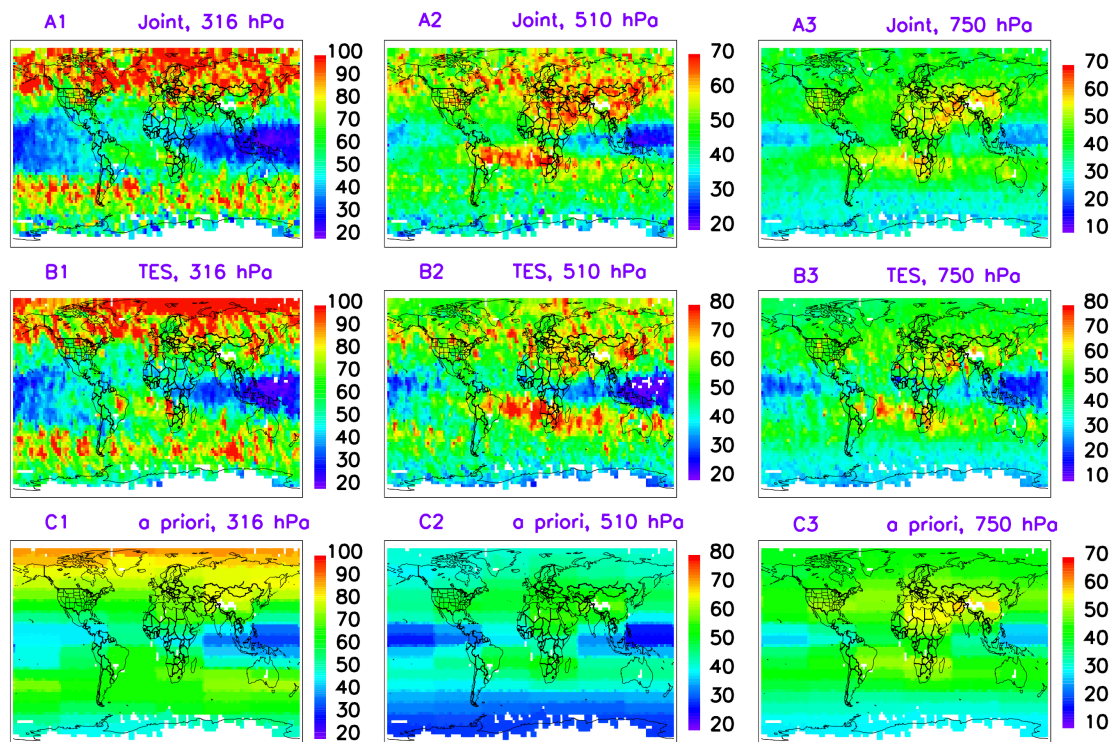

Figure S8: Global maps of monthly averaged ozone ( $O_3$ ) volume mixing ratio (VMR) with a unit of ppb. The A-Train measurements in September 2006 were used in creating these global maps. Comparison of Joint AIRS+OMI (top row, A), TES (middle row, B), and a priori (bottom row C) ozone VMR for the pressure level of 316, 510 and 750 hPa (columns left, middle, right), respectively. All data have been gridded to  $2.5^\circ \times 2.5^\circ$  cells.

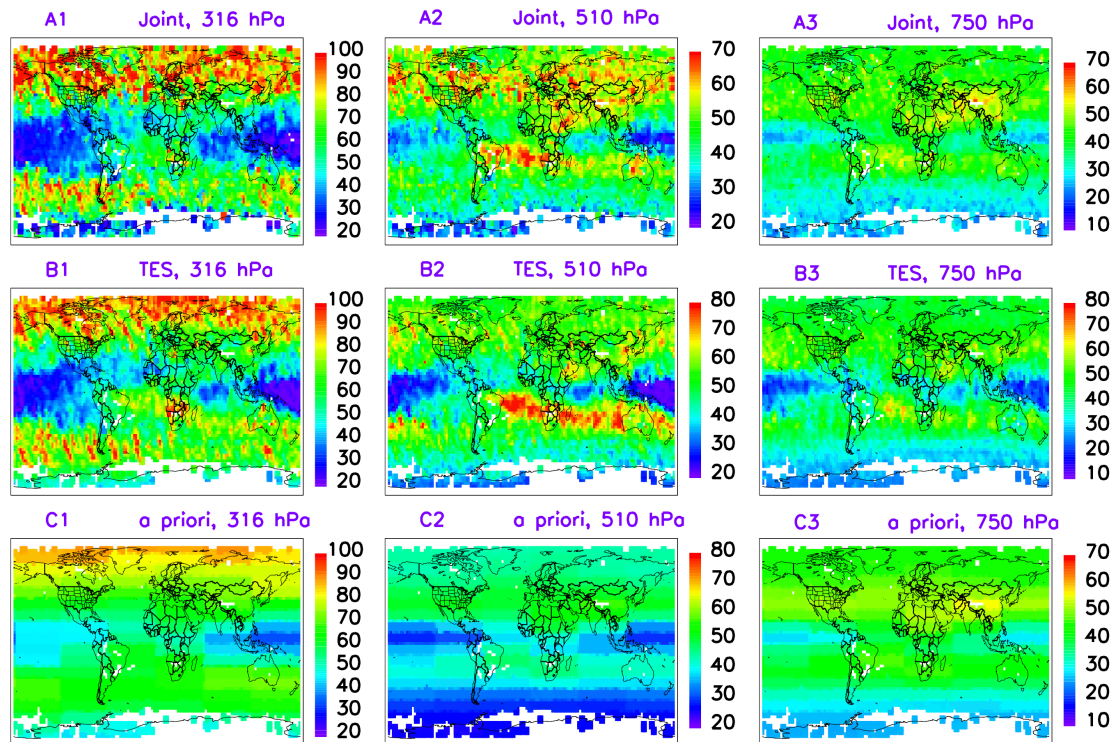

Figure S9: Global maps of monthly averaged ozone ( $O_3$ ) volume mixing ratio (VMR) with a unit of ppb. The A-Train measurements in October 2006 were used in creating these global maps. Comparison of Joint AIRS+OMI (top row, A), TES (middle row, B), and a priori (bottom row C) ozone VMR for the pressure level of 316, 510 and 750 hPa (columns left, middle, right), respectively. All data have been gridded to  $2.5^\circ \times 2.5^\circ$  cells.

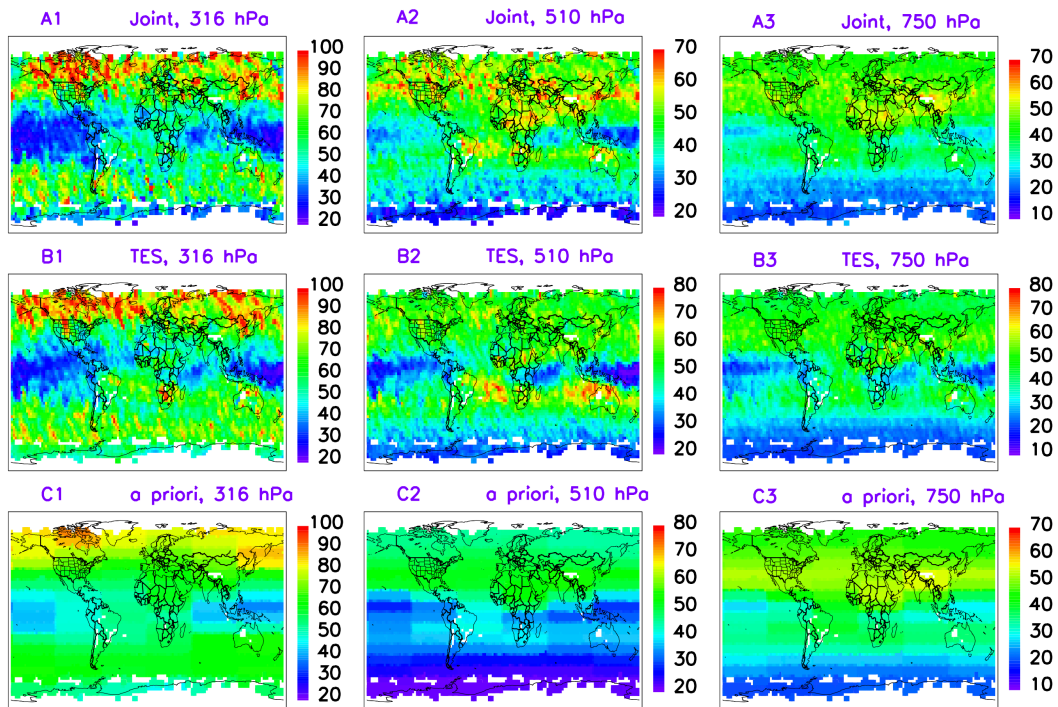

Figure S10: Global maps of monthly averaged ozone ( $O_3$ ) volume mixing ratio (VMR) with a unit of ppb. The A-Train measurements in November 2006 were used in creating these global maps. Comparison of Joint AIRS+OMI (top row, A), TES (middle row, B), and a priori (bottom row C) ozone VMR for the pressure level of 316, 510 and 750 hPa (columns left, middle, right), respectively. All data have been gridded to  $2.5^\circ \times 2.5^\circ$  cells.

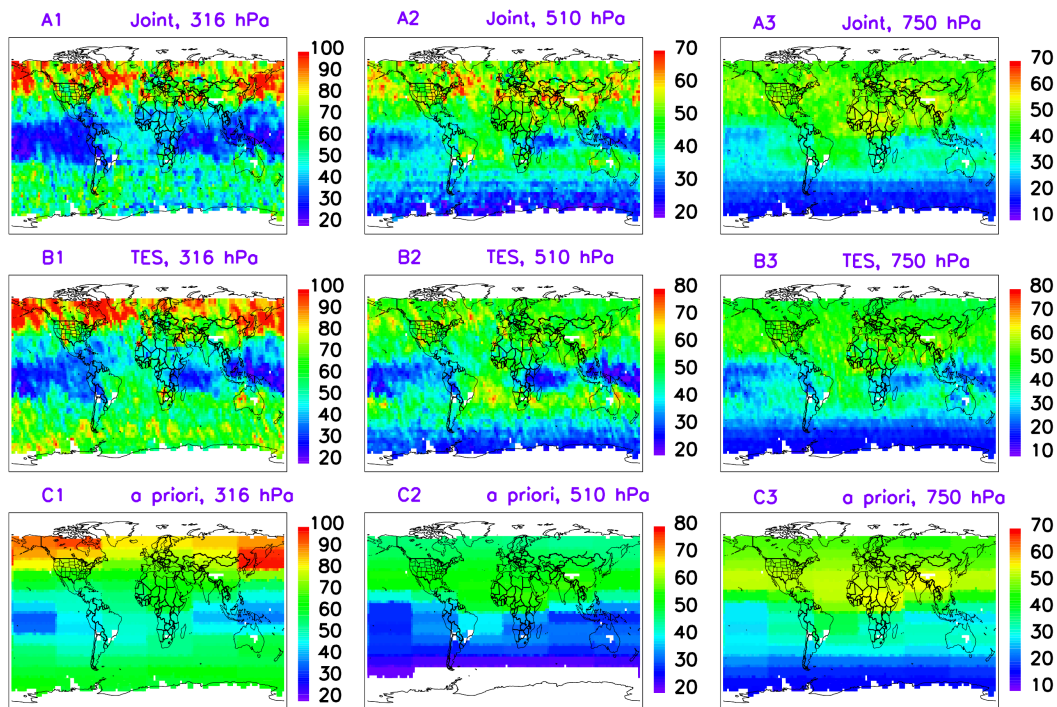

Figure S11: Global maps of monthly averaged ozone ( $O_3$ ) volume mixing ratio (VMR) with a unit of ppb. The A-Train measurements in December 2006 were used in creating these global maps. Comparison of Joint AIRS+OMI (top row, A), TES (middle row, B), and a priori (bottom row C) ozone VMR for the pressure level of 316, 510 and 750 hPa (columns left, middle, right), respectively. All data have been gridded to  $2.5^\circ \times 2.5^\circ$  cells.

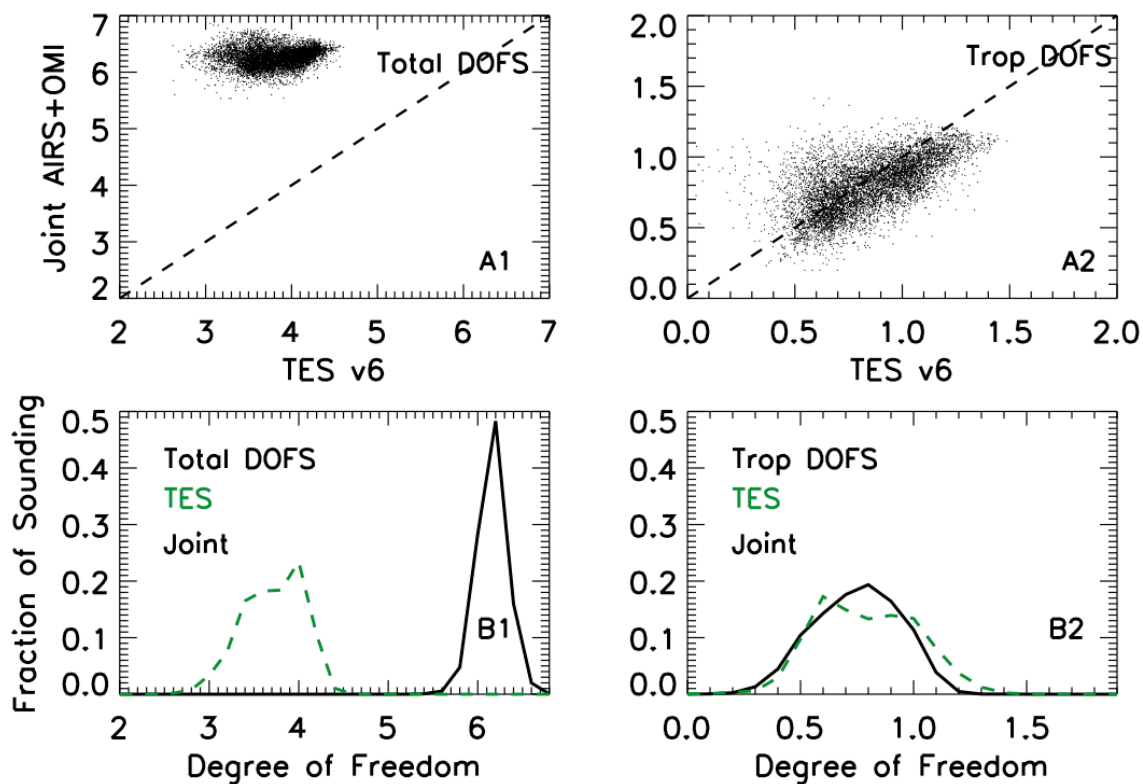

Figure S12: Degree of freedom of signals (DOFS) for January 2006 monthly mean  $O_3$  over globe shown in Fig. S1. (A1) total DOFS; (A2) tropospheric DOFS; and (B1) histogram of total DOFS: joint AIRS+OMI (black line) and TES version 6 (green dash); (B2) histogram of tropospheric DOFS joint AIRS+OMI (black line) and TES version 6 (green dash).

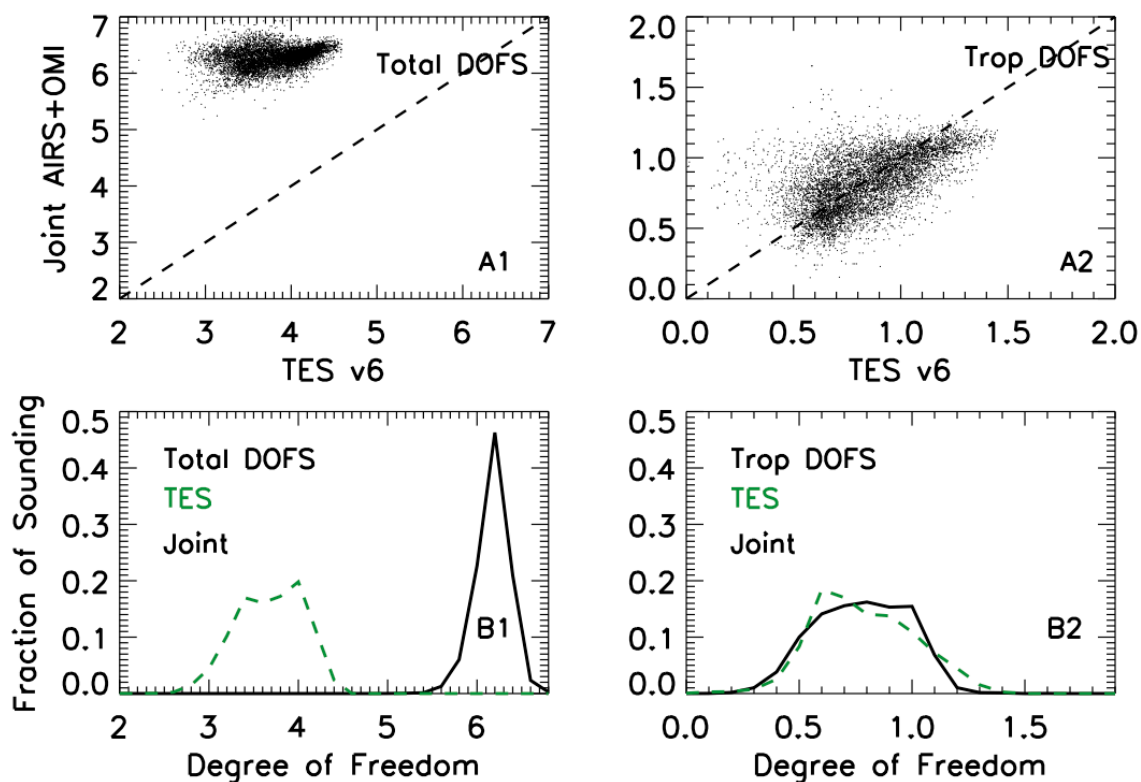

Figure S13: Degree of freedom of signals (DOFS) for February 2006 monthly mean  $O_3$  over globe shown in Fig. S2. (A1) total DOFS; (A2) tropospheric DOFS; and (B1) histogram of total DOFS: joint AIRS+OMI (black line) and TES version 6 (green dash); (B2) histogram of tropospheric DOFS joint AIRS+OMI (black line) and TES version 6 (green dash).

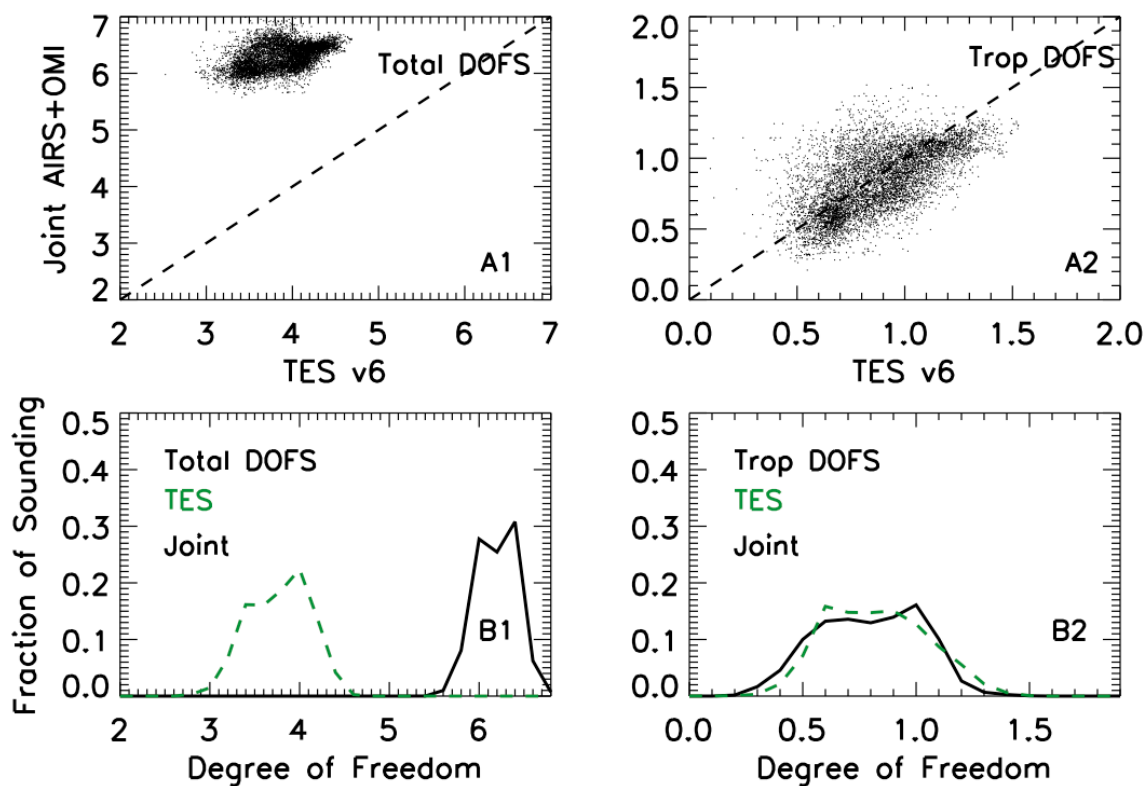

Figure S14: Degree of freedom of signals (DOFS) for March 2006 monthly mean O<sub>3</sub> over globe shown in Fig. S3. (A1) total DOFS; (A2) tropospheric DOFS; and (B1) histogram of total DOFS: joint AIRS+OMI (black line) and TES version 6 (green dash); (B2) histogram of tropospheric DOFS joint AIRS+OMI (black line) and TES version 6 (green dash).

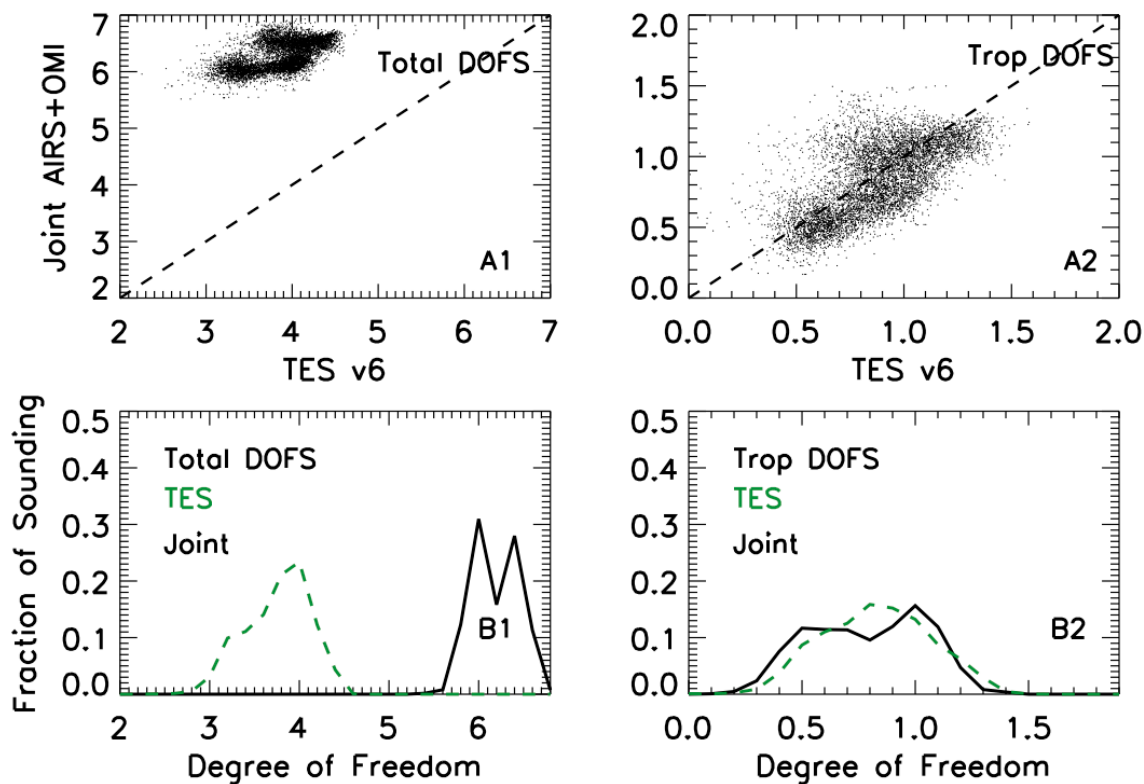

Figure S15: Degree of freedom of signals (DOFS) for April 2006 monthly mean  $O_3$  over globe shown in Fig. S4. (A1) total DOFS; (A2) tropospheric DOFS; and (B1) histogram of total DOFS: joint AIRS+OMI (black line) and TES version 6 (green dash); (B2) histogram of tropospheric DOFS joint AIRS+OMI (black line) and TES version 6 (green dash).

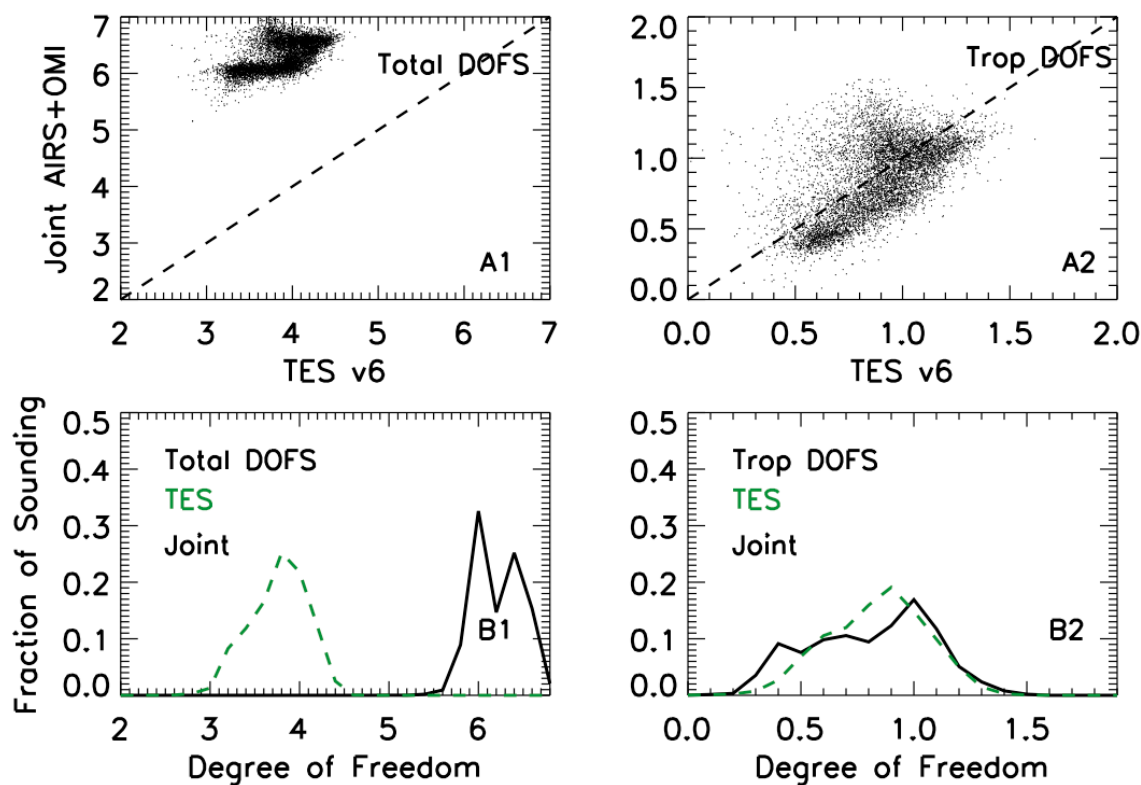

Figure S16: Degree of freedom of signals (DOFS) for May 2006 monthly mean  $O_3$  over globe shown in Fig. S5. (A1) total DOFS; (A2) tropospheric DOFS; and (B1) histogram of total DOFS: joint AIRS+OMI (black line) and TES version 6 (green dash); (B2) histogram of tropospheric DOFS joint AIRS+OMI (black line) and TES version 6 (green dash).

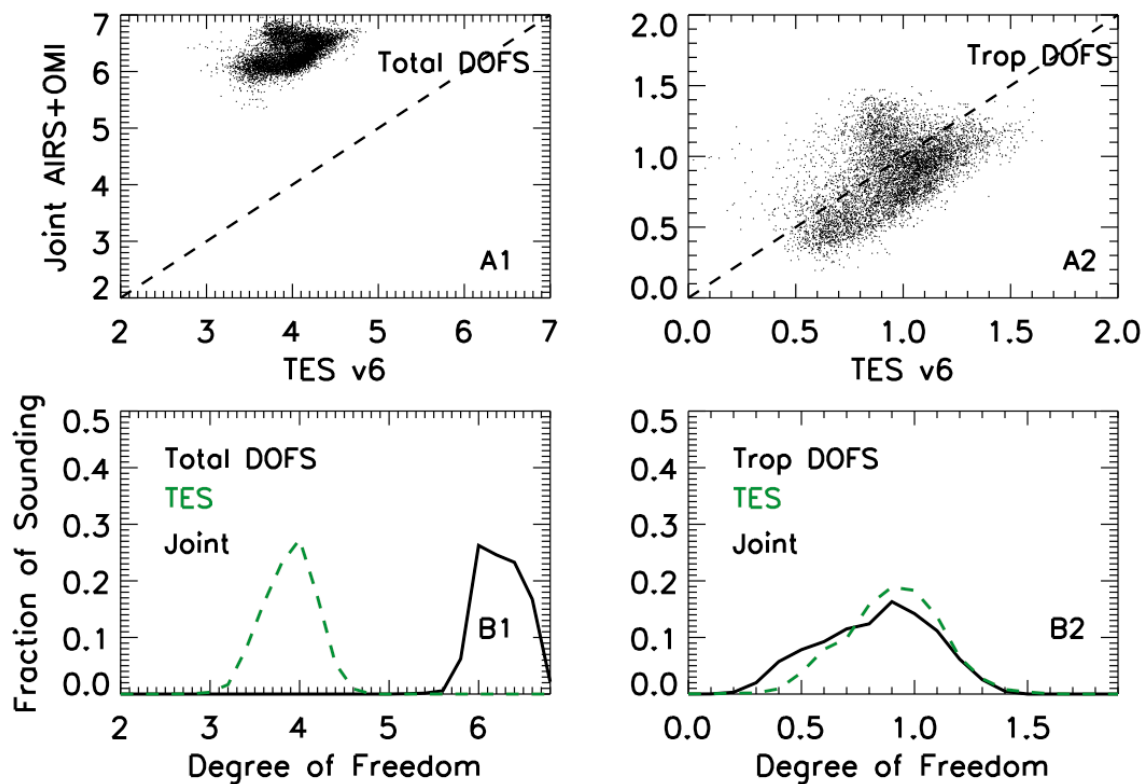

Figure S17: Degree of freedom of signals (DOFS) for June 2006 monthly mean  $O_3$  over globe shown in Fig. S6. (A1) total DOFS; (A2) tropospheric DOFS; and (B1) histogram of total DOFS: joint AIRS+OMI (black line) and TES version 6 (green dash); (B2) histogram of tropospheric DOFS joint AIRS+OMI (black line) and TES version 6 (green dash).

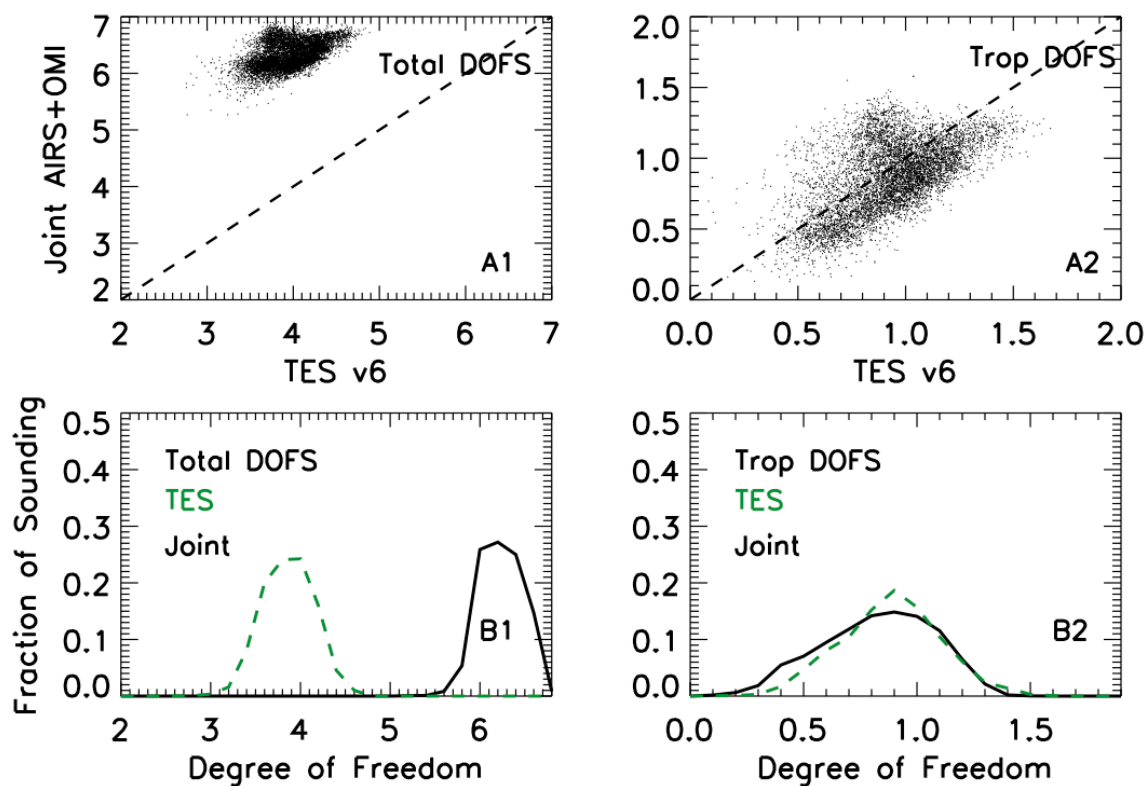

Figure S18: Degree of freedom of signals (DOFS) for July 2006 monthly mean  $O_3$  over globe shown in Fig. S7. (A1) total DOFS; (A2) tropospheric DOFS; and (B1) histogram of total DOFS: joint AIRS+OMI (black line) and TES version 6 (green dash); (B2) histogram of tropospheric DOFS joint AIRS+OMI (black line) and TES version 6 (green dash).

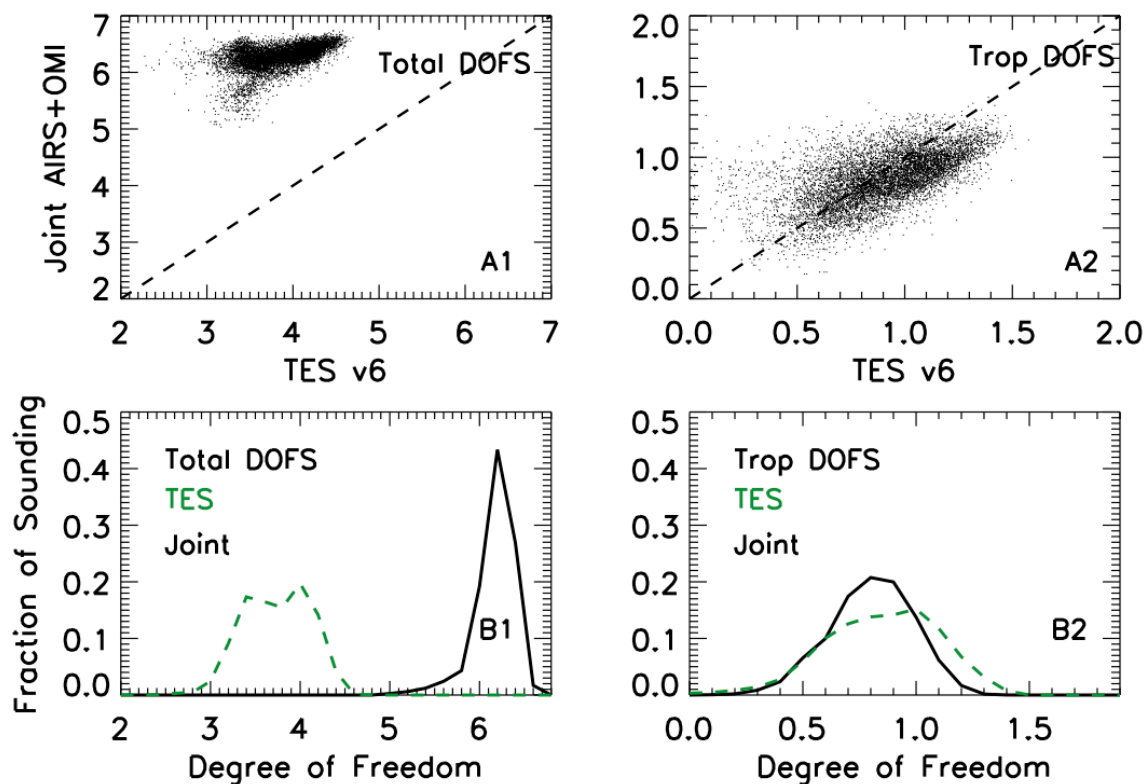

Figure S19: Degree of freedom of signals (DOFS) for September 2006 monthly mean  $O_3$  over globe shown in Fig. S8. (A1) total DOFS; (A2) tropospheric DOFS; and (B1) histogram of total DOFS: joint AIRS+OMI (black line) and TES version 6 (green dash); (B2) histogram of tropospheric DOFS joint AIRS+OMI (black line) and TES version 6 (green dash).

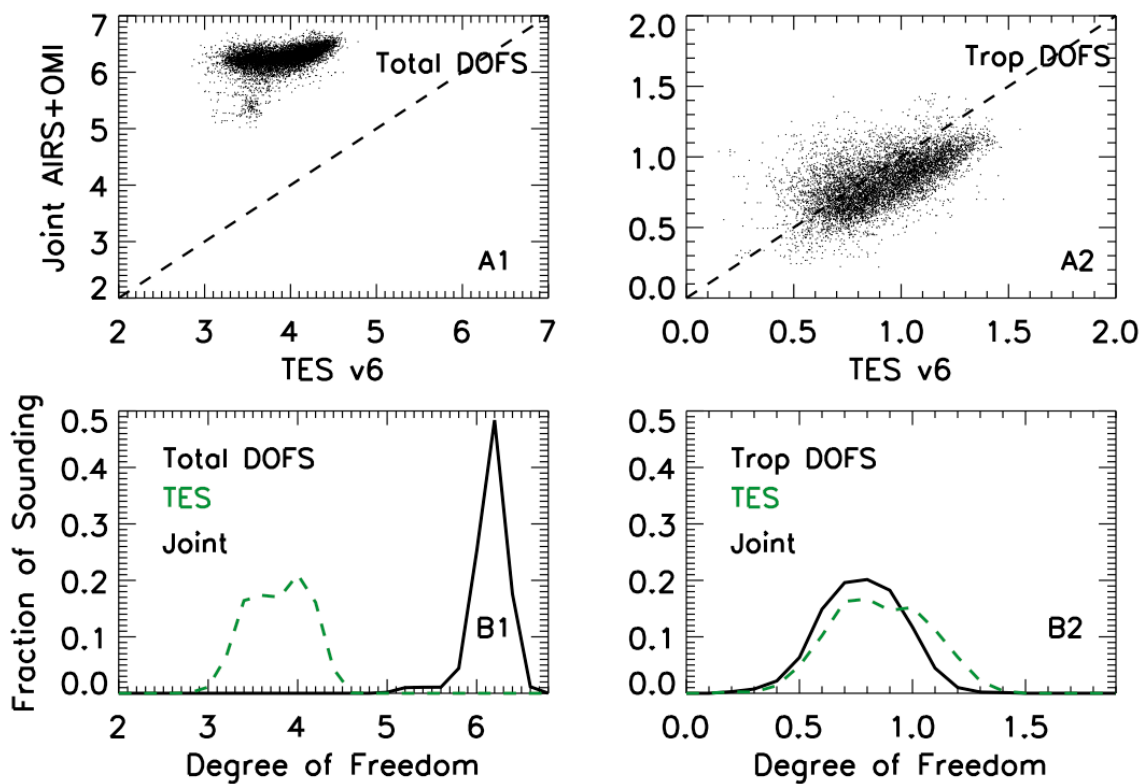

Figure S20: Degree of freedom of signals (DOFS) for October 2006 monthly mean  $O_3$  over globe shown in Fig. S9. (A1) total DOFS; (A2) tropospheric DOFS; and (B1) histogram of total DOFS: joint AIRS+OMI (black line) and TES version 6 (green dash); (B2) histogram of tropospheric DOFS joint AIRS+OMI (black line) and TES version 6 (green dash).

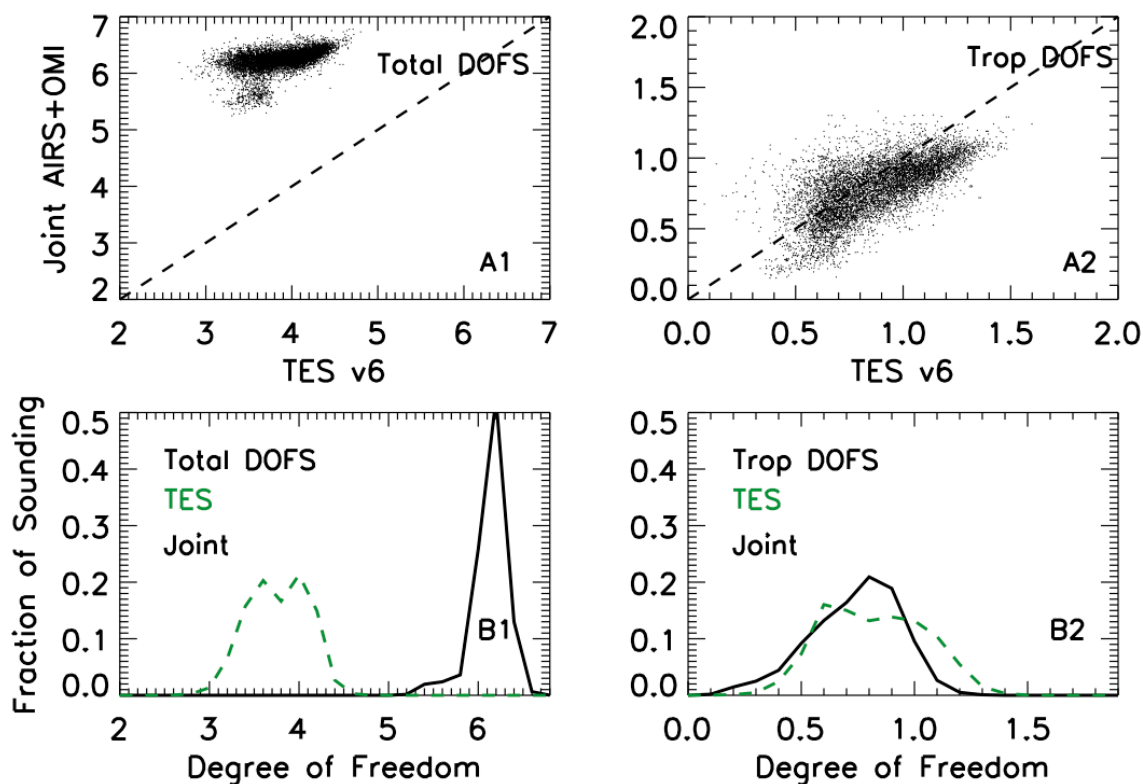

Figure S21: Degree of freedom of signals (DOFS) for November 2006 monthly mean  $O_3$  over globe shown in Fig. S10. (A1) total DOFS; (A2) tropospheric DOFS; and (B1) histogram of total DOFS: joint AIRS+OMI (black line) and TES version 6 (green dash); (B2) histogram of tropospheric DOFS joint AIRS+OMI (black line) and TES version 6 (green dash).

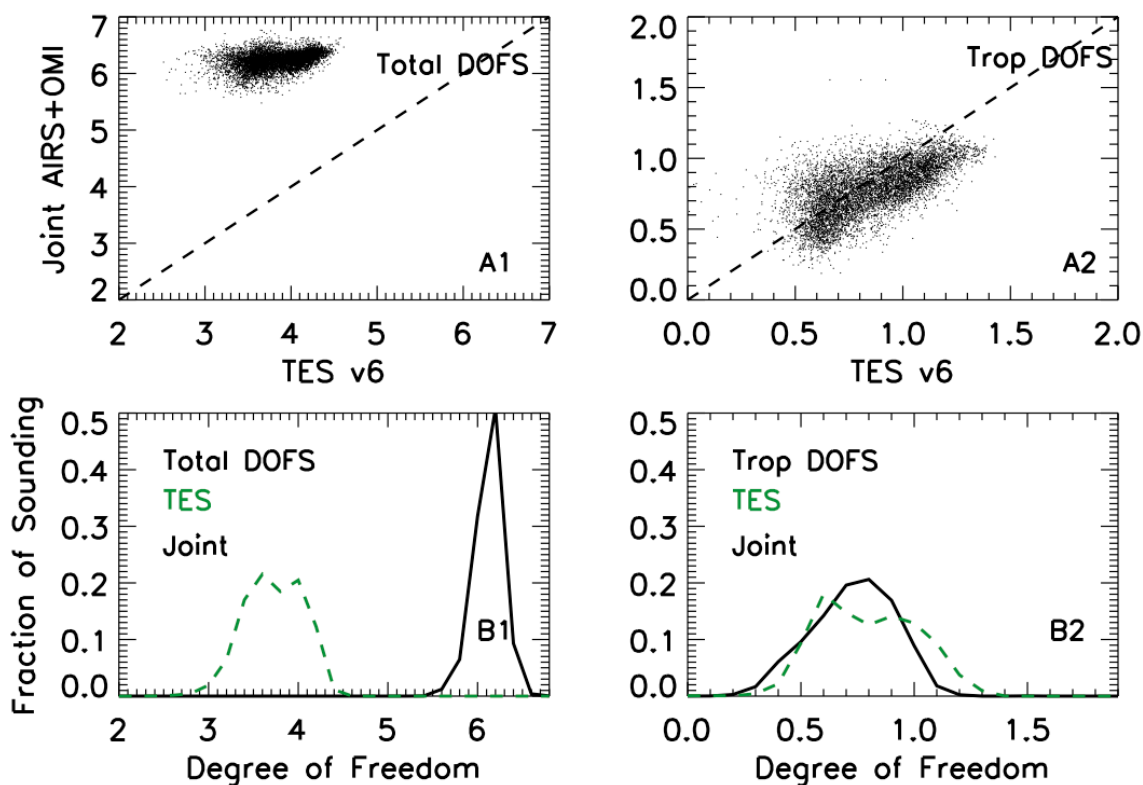

Figure S22: Degree of freedom of signals (DOFS) for December 2006 monthly mean  $O_3$  over globe shown in Fig. S11. (A1) total DOFS; (A2) tropospheric DOFS; and (B1) histogram of total DOFS: joint AIRS+OMI (black line) and TES version 6 (green dash); (B2) histogram of tropospheric DOFS joint AIRS+OMI (black line) and TES version 6 (green dash).

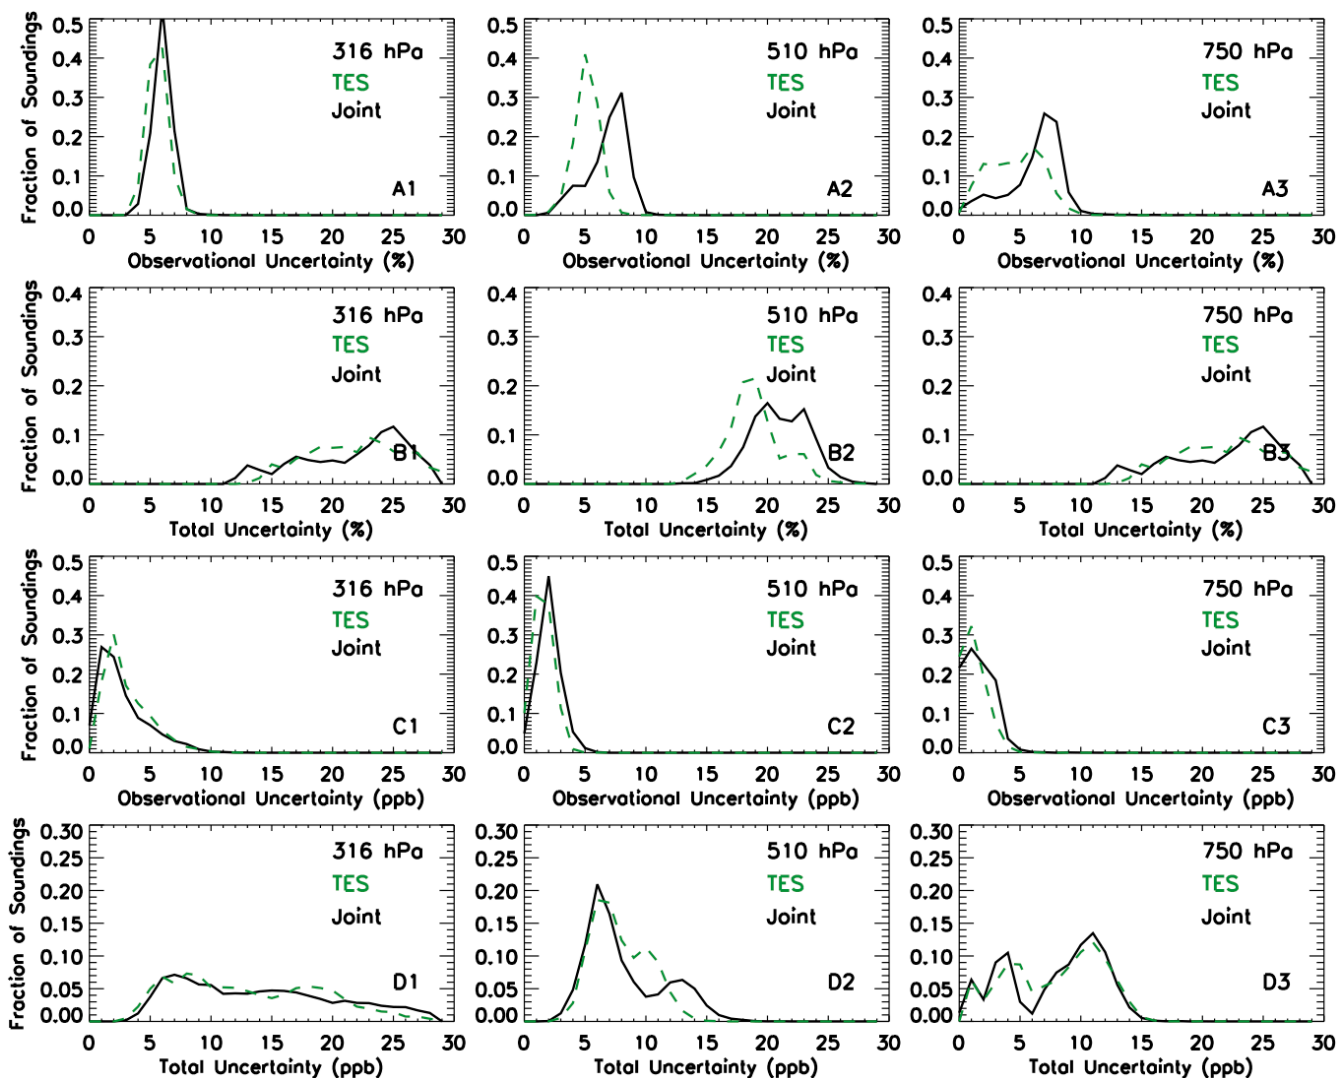

Figure S23: Estimated error of retrieved global O<sub>3</sub> concentration for January 2006 shown in Fig. S1. (A1–A3) observational error; (B1–B3) total error; (C1–C3) observational error in ppb; (D1–D3) total error in ppb. Joint AIRS+OMI data are shown in black line, and TES version 6 data are shown in green dash.

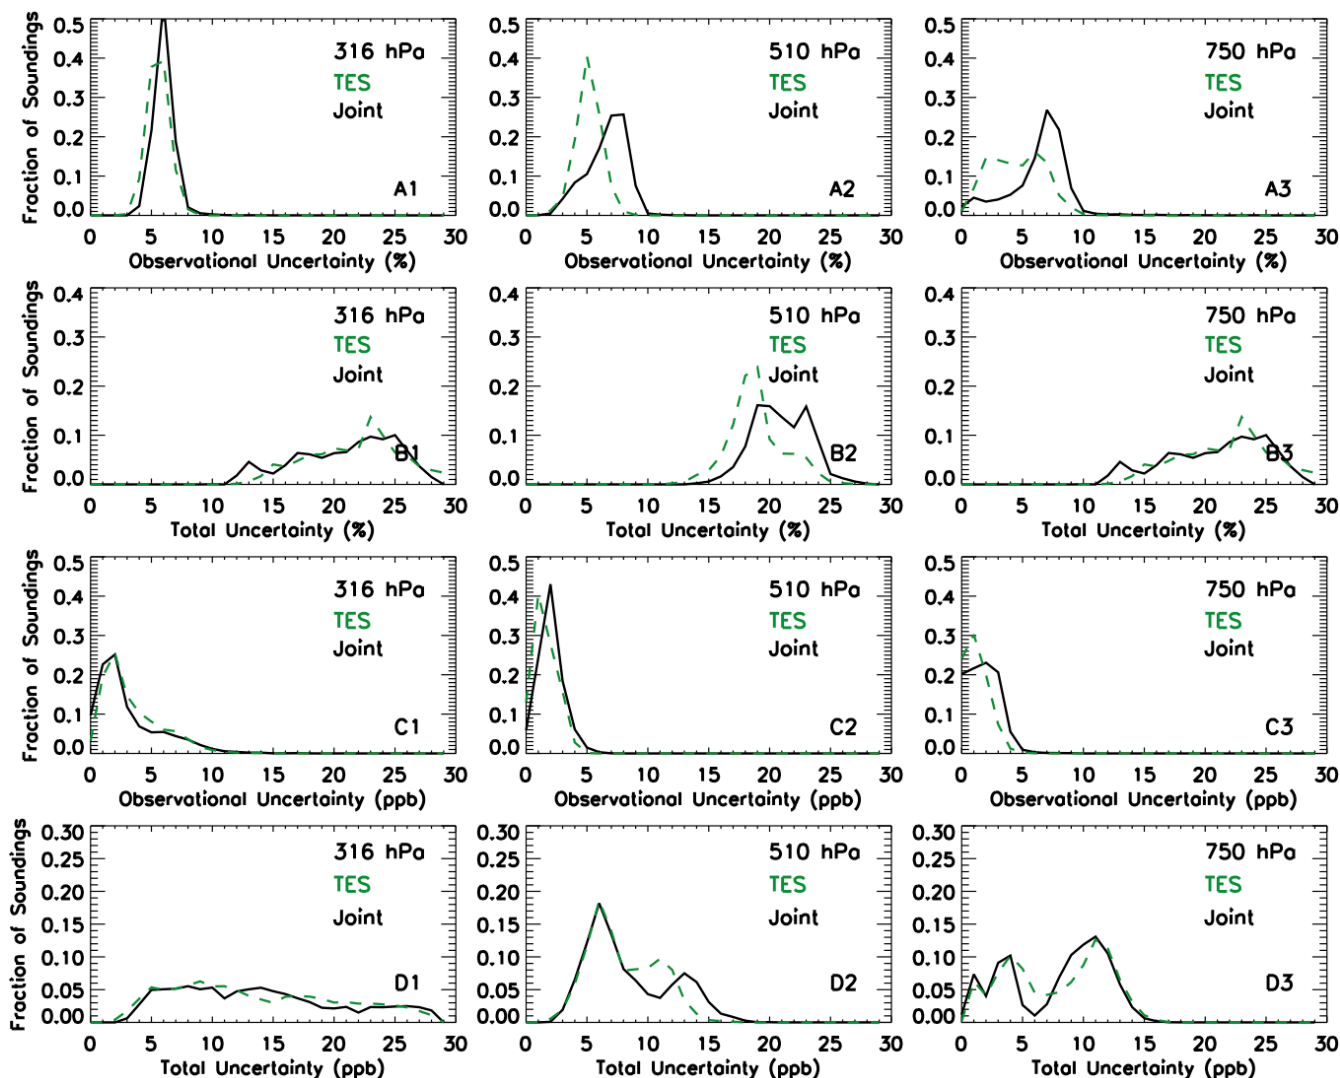

Figure S24: Estimated error of retrieved global  $O_3$  concentration for February 2006 shown in Fig. S2. (A1–A3) observational error; (B1–B3) total error; (C1–C3) observational error in ppb; (D1–D3) total error in ppb. Joint AIRS+OMI data are shown in black line, and TES version 6 data are shown in green dash.

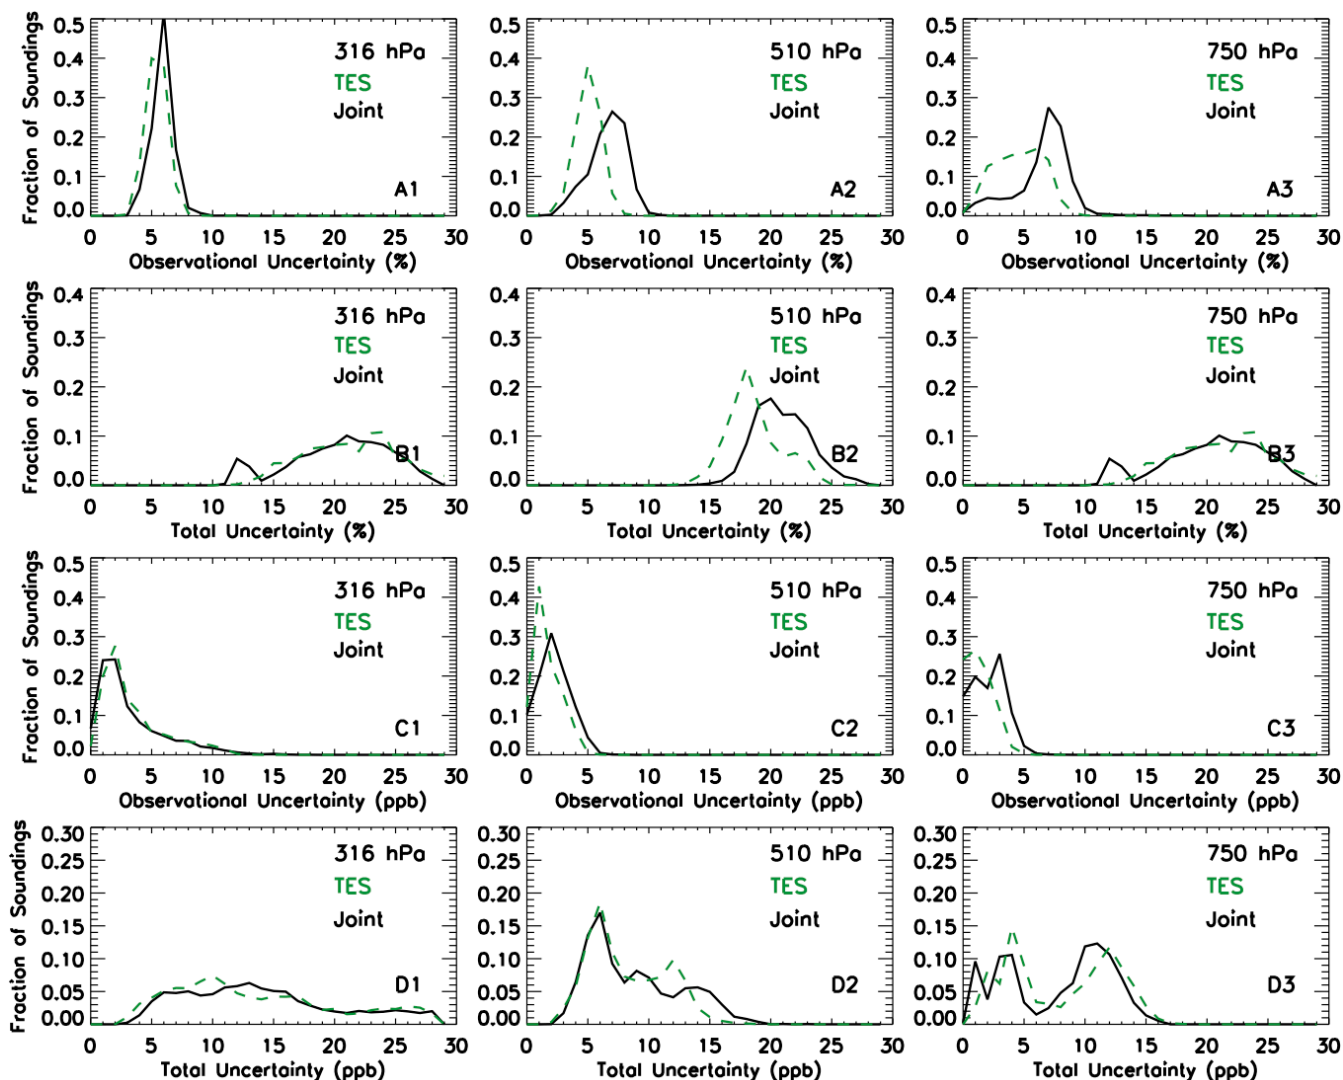

Figure S25: Estimated error of retrieved global O<sub>3</sub> concentration for March 2006 shown in Fig. S3. (A1–A3) observational error; (B1–B3) total error; (C1–C3) observational error in ppb; (D1–D3) total error in ppb. Joint AIRS+OMI data are shown in black line, and TES version 6 data are shown in green dash.

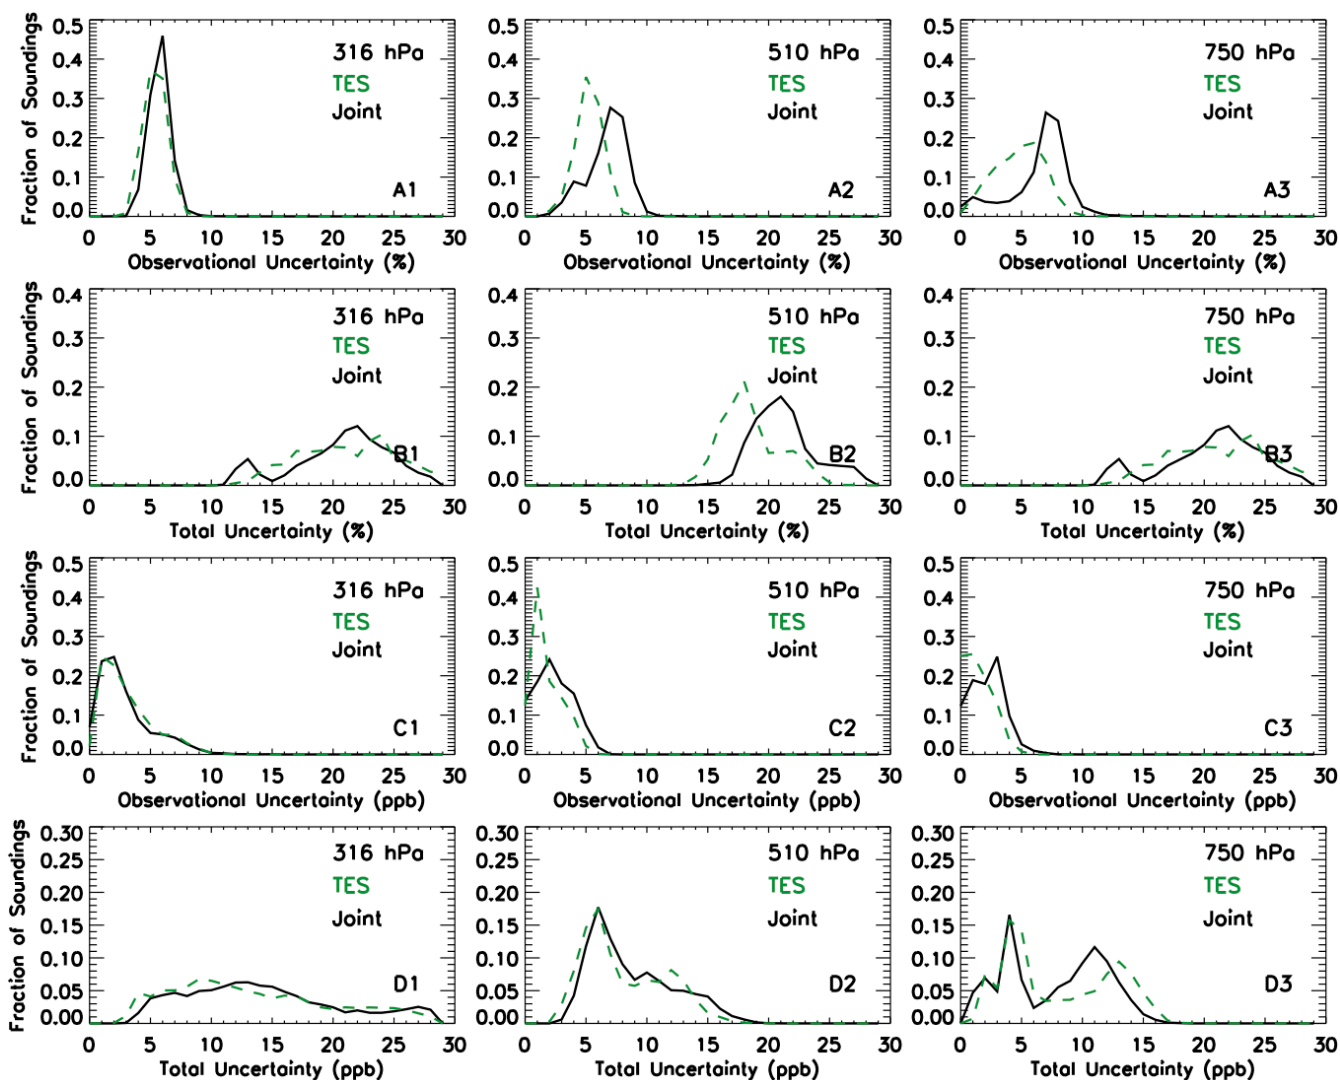

Figure S26: Estimated error of retrieved global O<sub>3</sub> concentration for April 2006 shown in Fig. S4. (A1–A3) observational error; (B1–B3) total error; (C1–C3) observational error in ppb; (D1–D3) total error in ppb. Joint AIRS+OMI data are shown in black line, and TES version 6 data are shown in green dash.

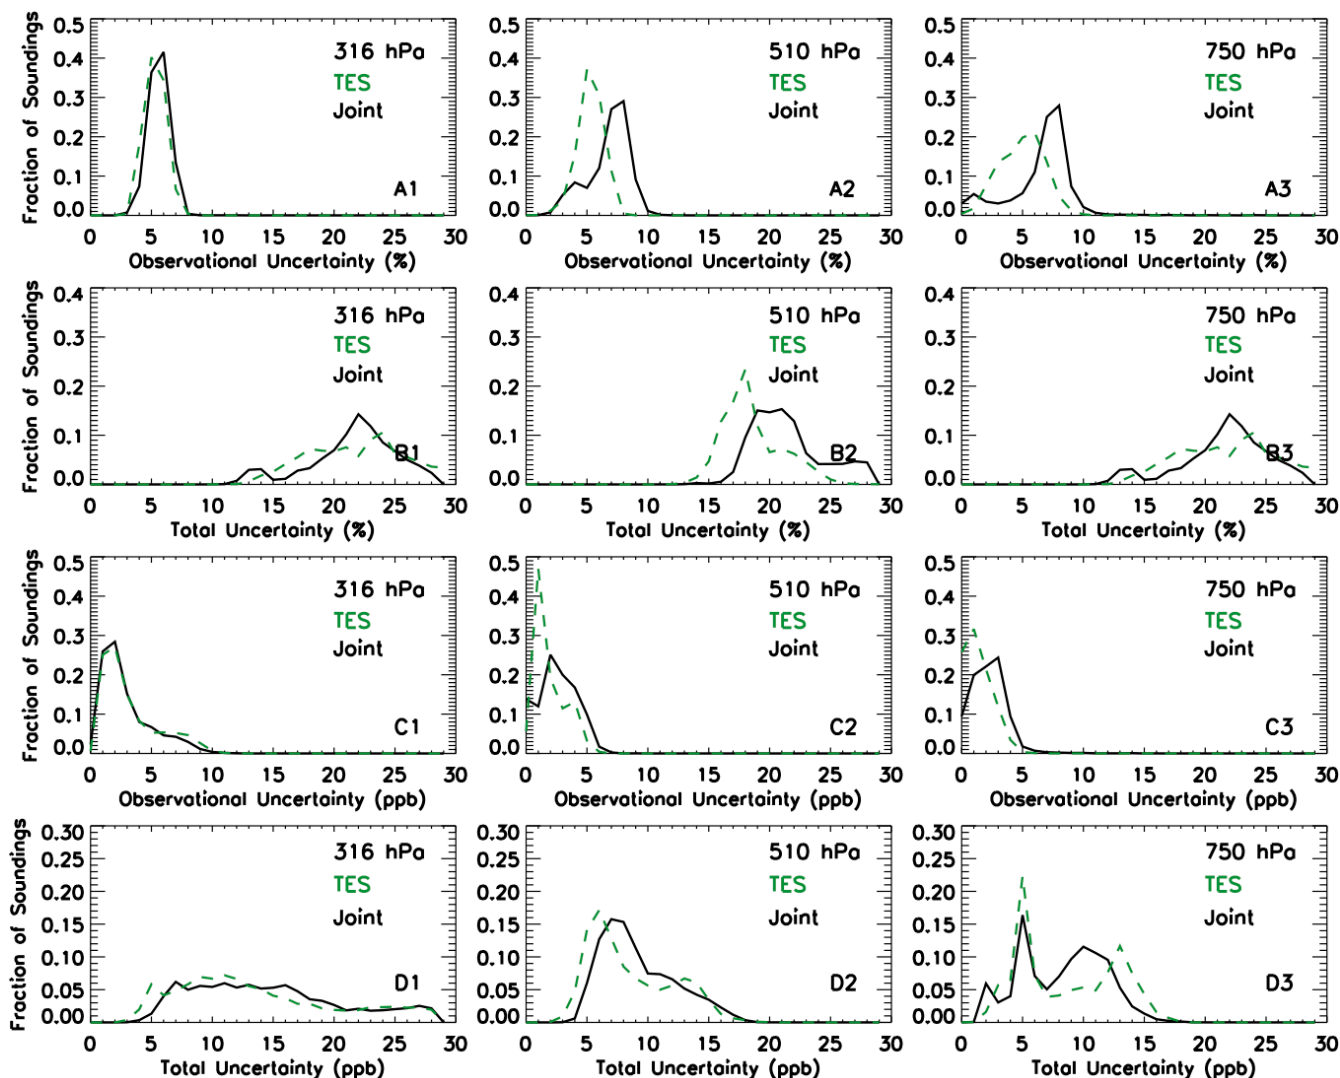

Figure S27: Estimated error of retrieved global  $O_3$  concentration for May 2006 shown in Fig. S5. (A1–A3) observational error; (B1–B3) total error; (C1–C3) observational error in ppb; (D1–D3) total error in ppb. Joint AIRS+OMI data are shown in black line, and TES version 6 data are shown in green dash.

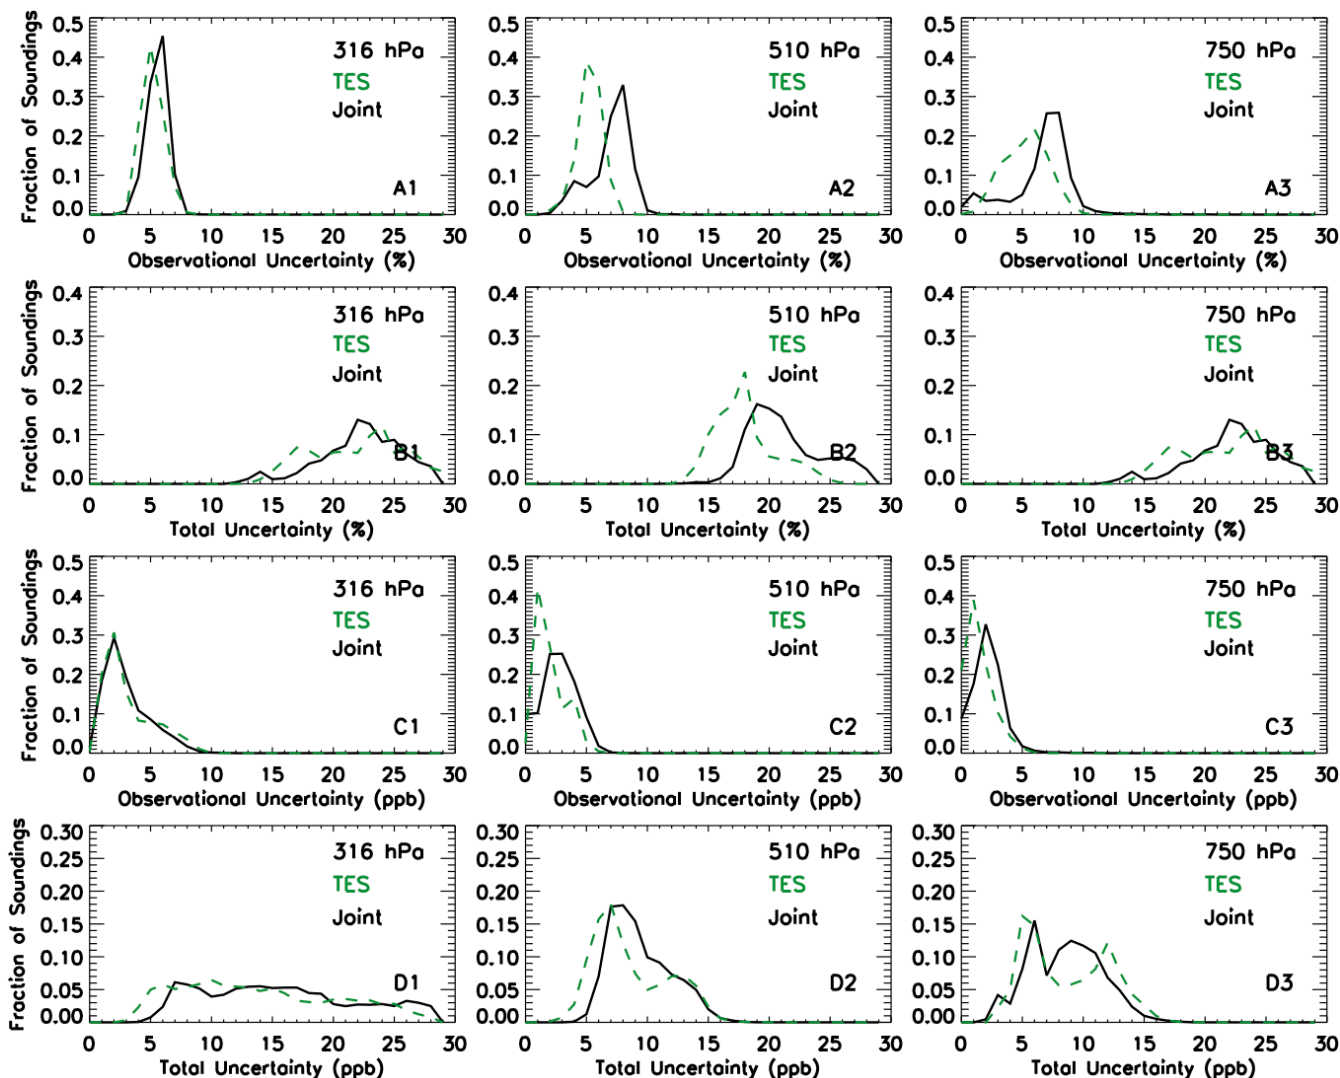

Figure S28: Estimated error of retrieved global O<sub>3</sub> concentration for June 2006 shown in Fig. S6. (A1–A3) observational error; (B1–B3) total error; (C1–C3) observational error in ppb; (D1–D3) total error in ppb. Joint AIRS+OMI data are shown in black line, and TES version 6 data are shown in green dash.

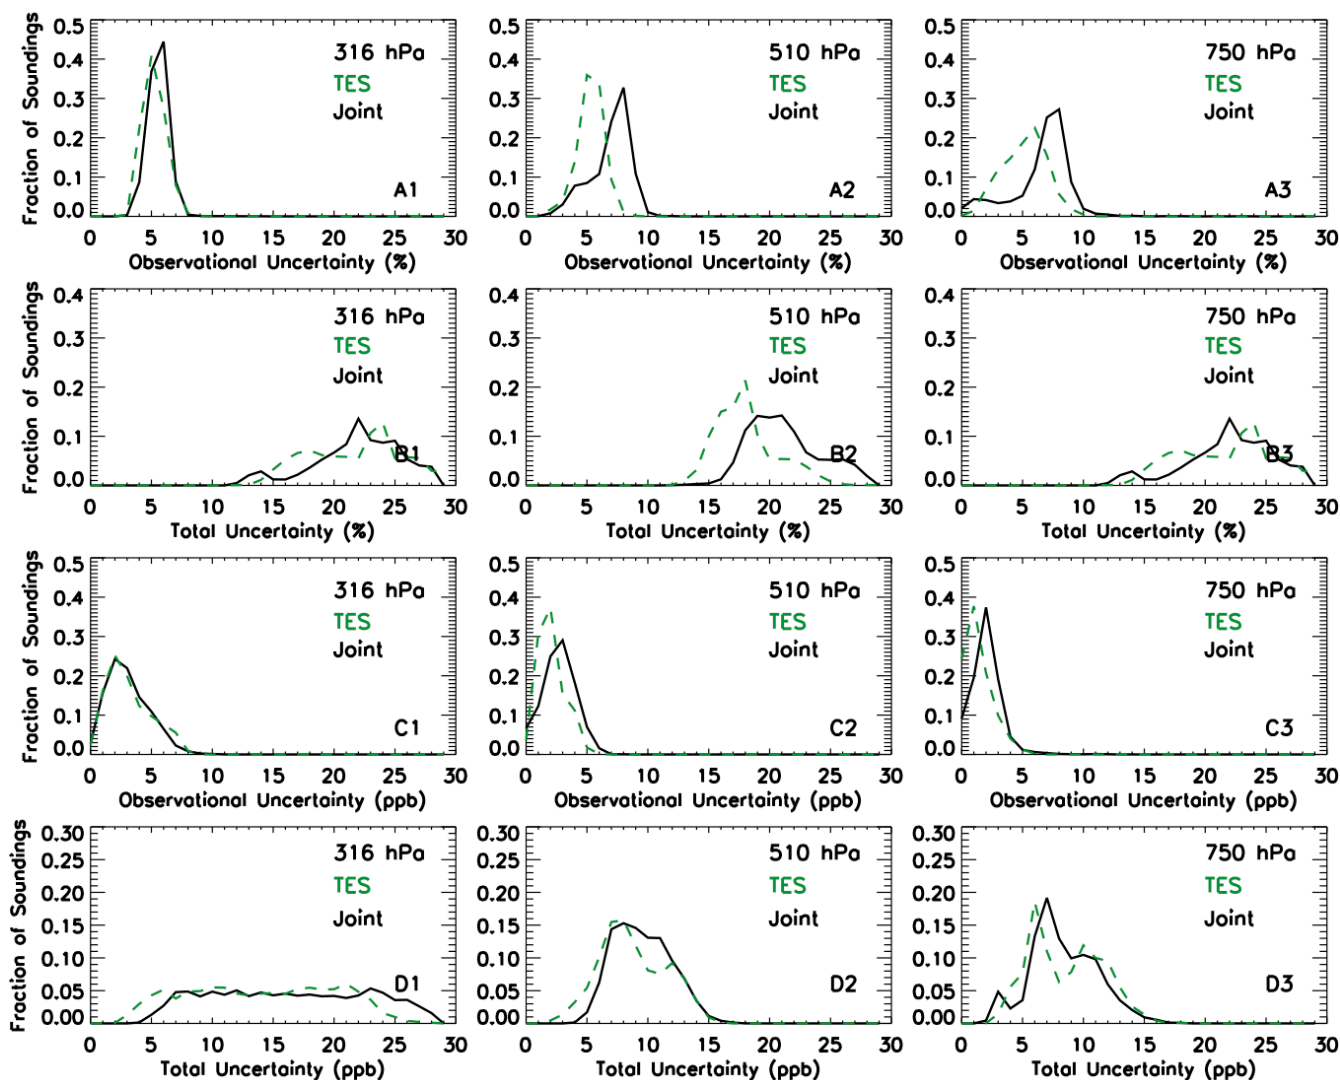

Figure S29: Estimated error of retrieved global  $O_3$  concentration for July 2006 shown in Fig. S7. (A1–A3) observational error; (B1–B3) total error; (C1–C3) observational error in ppb; (D1–D3) total error in ppb. Joint AIRS+OMI data are shown in black line, and TES version 6 data are shown in green dash.

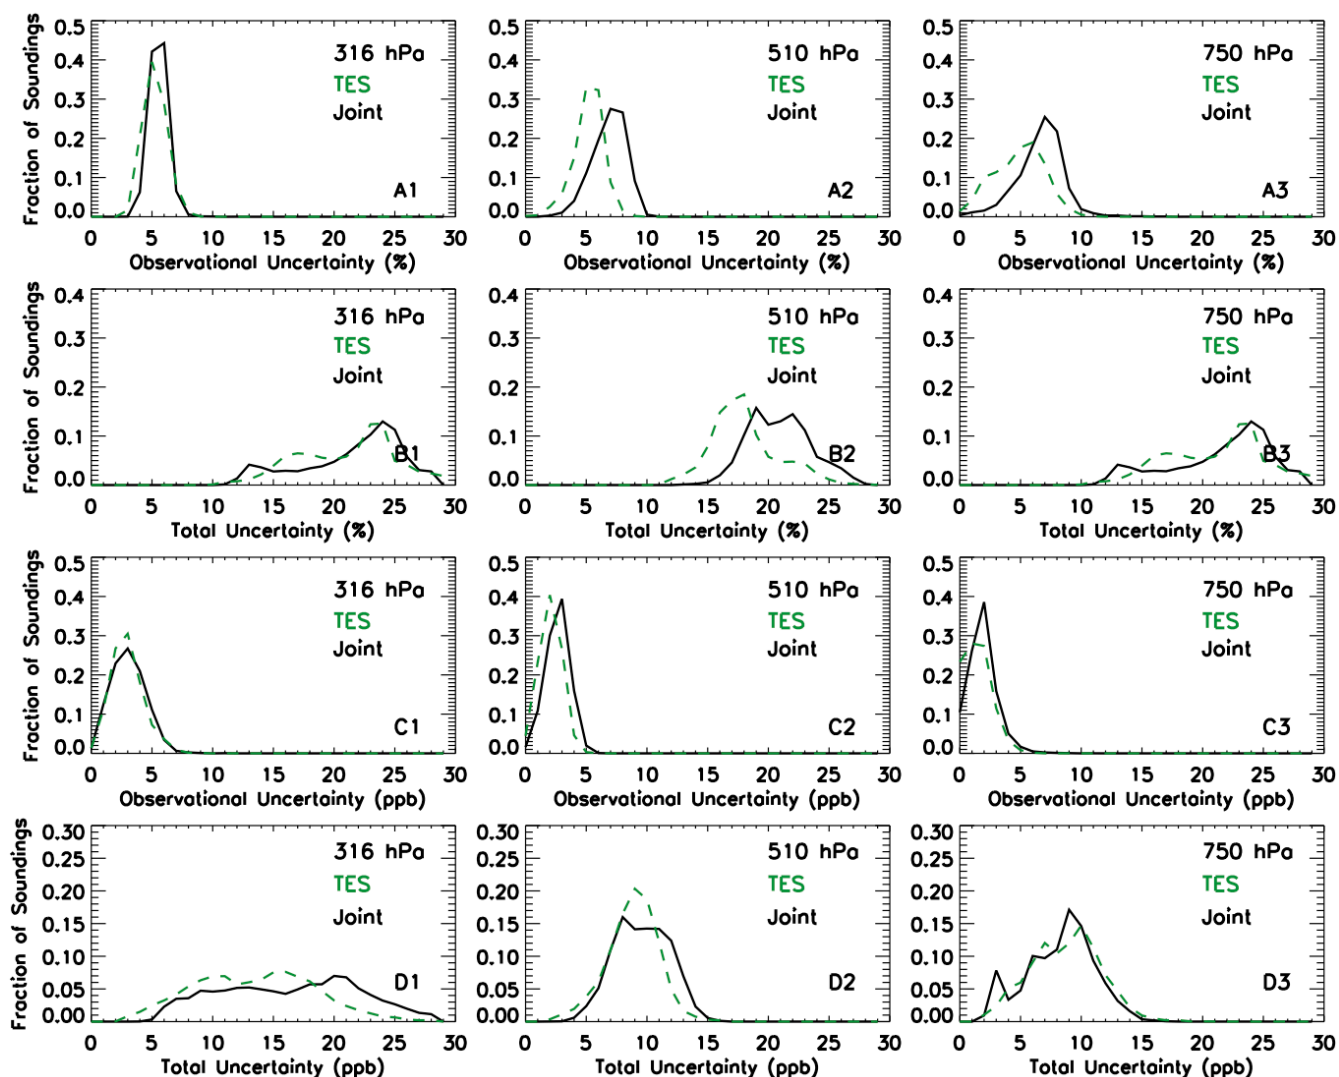

Figure S30: Estimated error of retrieved global  $O_3$  concentration for September 2006 shown in Fig. S8. (A1–A3) observational error; (B1–B3) total error; (C1–C3) observational error in ppb; (D1–D3) total error in ppb. Joint AIRS+OMI data are shown in black line, and TES version 6 data are shown in green dash.

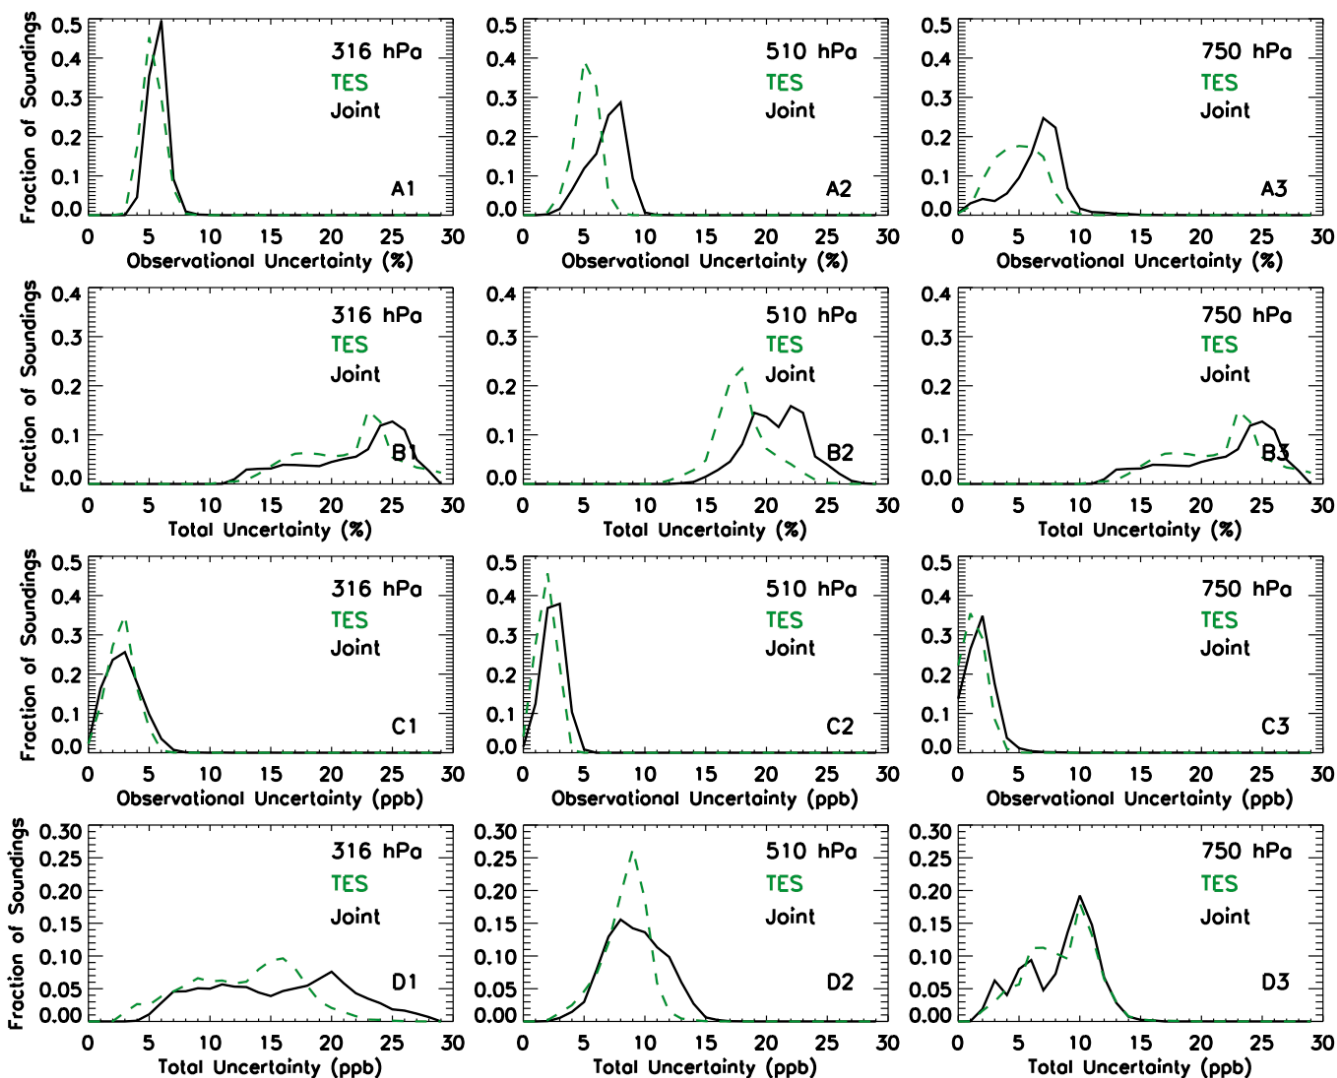

Figure S31: Estimated error of retrieved global O<sub>3</sub> concentration for October 2006 shown in Fig. S9. (A1–A3) observational error; (B1–B3) total error; (C1–C3) observational error in ppb; (D1–D3) total error in ppb. Joint AIRS+OMI data are shown in black line, and TES version 6 data are shown in green dash.

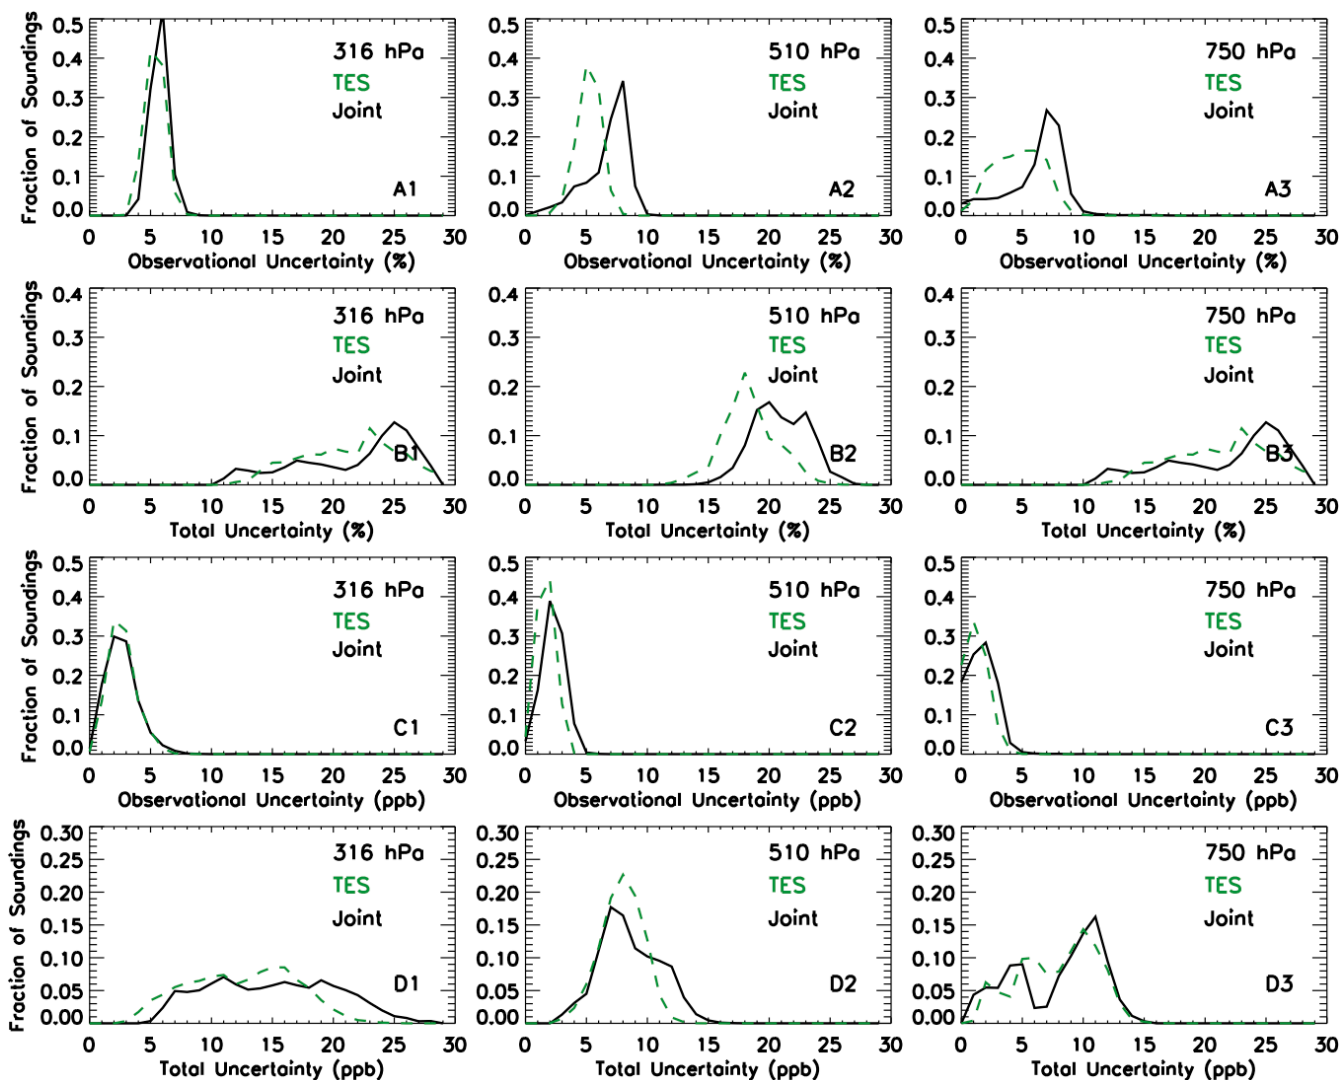

Figure S32: Estimated error of retrieved global O<sub>3</sub> concentration for November 2006 shown in Fig. S10. (A1–A3) observational error; (B1–B3) total error; (C1–C3) observational error in ppb; (D1–D3) total error in ppb. Joint AIRS+OMI data are shown in black line, and TES version 6 data are shown in green dash.

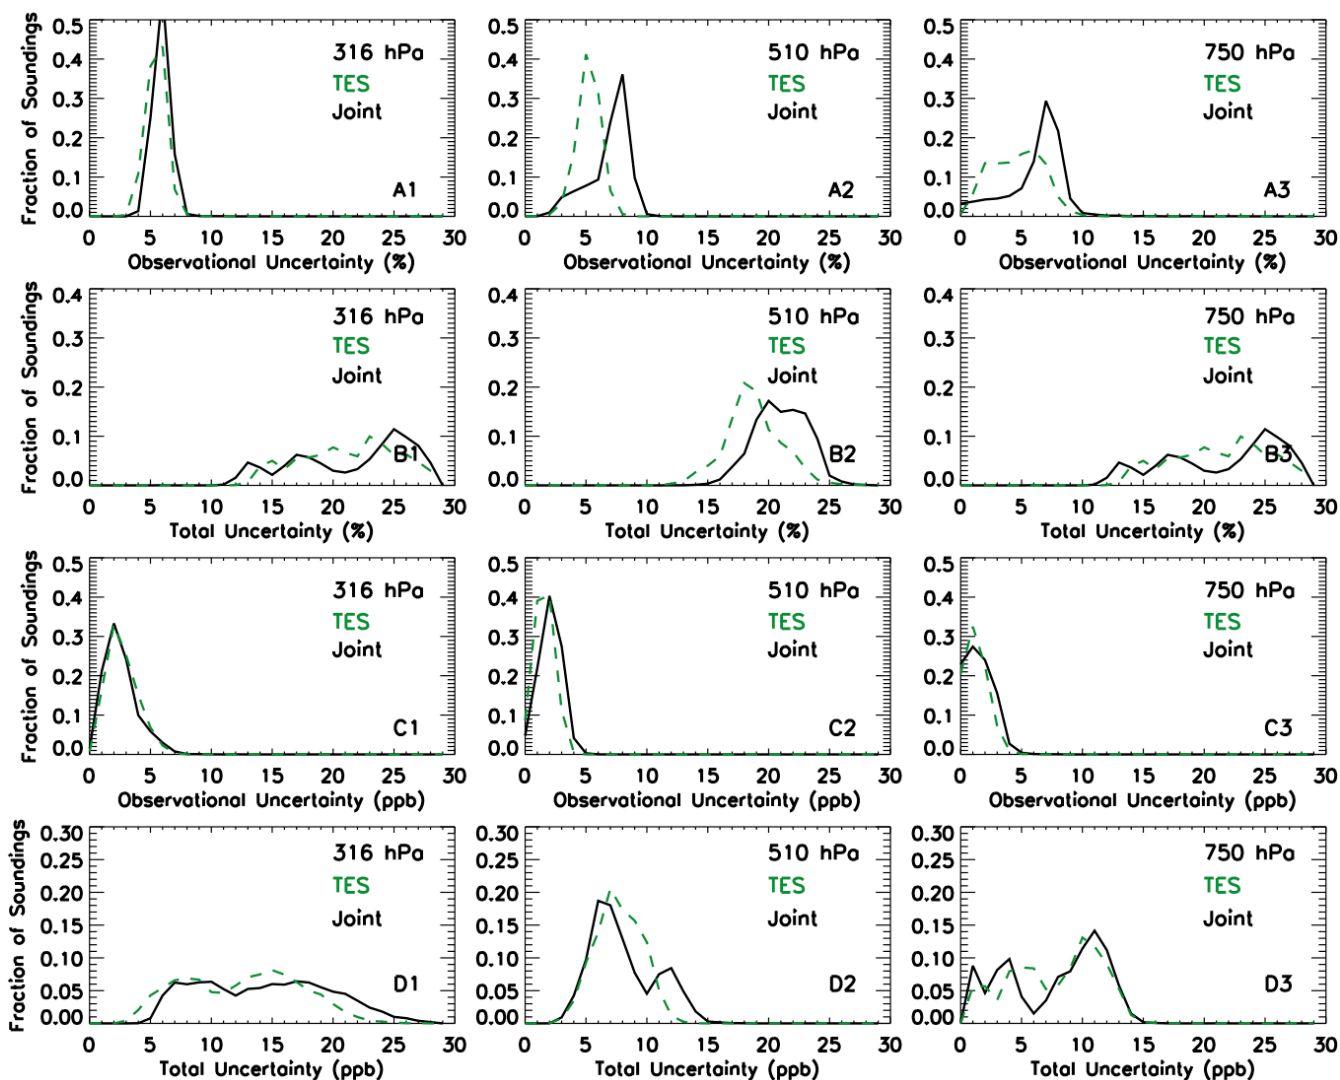

Figure S33: Estimated error of retrieved global  $O_3$  concentration for December 2006 shown in Fig. S11. (A1–A3) observational error; (B1–B3) total error; (C1–C3) observational error in ppb; (D1–D3) total error in ppb. Joint AIRS+OMI data are shown in black line, and TES version 6 data are shown in green dash.
